1 Individual Differences in Peripheral Hearing and Cognition Reveal Sentence Processing  
2 Differences in Healthy Older Adults

3 Ira Kurthen<sup>1</sup>, Martin Meyer<sup>2,3</sup>, Matthias Schlesewsky<sup>4</sup>, and Ina Bornkessel-Schlesewsky<sup>4</sup>

4 <sup>1</sup>Developmental Psychology: Infancy and Childhood, Department of Psychology,  
5 University of Zurich, Switzerland

6 <sup>2</sup>Neuropsychology, Department of Psychology, University of Zurich, Switzerland

7 <sup>3</sup>Cognitive Psychology Unit, Institute of Psychology, University of Klagenfurt, Austria

8 <sup>4</sup>Cognitive and Systems Neuroscience Research Hub, University of South Australia,  
9 Adelaide, SA, Australia

10

Abstract

11

12 When viewed cross-sectionally, aging seems to negatively affect speech comprehension.  
13 However, aging is a heterogeneous process, and variability among older adults is  
14 typically large. In this study, we investigated language comprehension as a function of  
15 individual differences in older adults. Specifically, we tested whether hearing thresholds,  
16 working memory, inhibition, and individual alpha frequency would predict event-related  
17 potential amplitudes in response to classic psycholinguistic manipulations at the  
18 sentence level. Twenty-nine healthy older adults (age range 61-76 years) listened to  
19 English sentences containing reduced relative clauses and object-relative clauses while  
20 their electroencephalogram was recorded. We found that hearing thresholds and  
21 working memory predicted P600 amplitudes early during reduced relative clause  
22 processing, while individual alpha frequency predicted P600 amplitudes at a later point  
23 in time. The results suggest that participants with better hearing and larger working  
24 memory capacity simultaneously activated both the preferred and the dispreferred  
25 interpretation of reduced relative clauses, while participants with worse hearing and  
26 smaller working memory capacity only activated the preferred interpretation. They also  
27 suggest that participants with a higher individual alpha frequency had a higher  
28 likelihood of successfully reanalysing the sentence towards the reduced relative clause  
29 reading than participants with a lower individual alpha frequency. By contrast, we  
30 found no relationship between object-relative clause processing and working memory or  
31 hearing thresholds. Taken together, the results support the view that older adults  
32 employ different strategies during auditory sentence processing dependent on their  
33 hearing and cognitive abilities and that there is no single ability that uniformly predicts  
34 sentence processing outcomes.

35 Individual Differences in Peripheral Hearing and Cognition Reveal Sentence Processing  
36 Differences in Healthy Older Adults

37 **Introduction**

38 There is overwhelming evidence that aging negatively affects speech comprehension.  
39 The reasons are manifold: sensory degradation occurs as hearing loss develops and  
40 cognitive resources dwindle as brain structure and function ultimately succumb to  
41 age-related decline. However, as in all aging research, variability is large. In order to  
42 understand differential trajectories of speech comprehension in old age, key abilities  
43 that support speech comprehension in difficult listening situations need to be identified,  
44 which is one of the declared goals of Cognitive Hearing Science (Arlinger, Lunner,  
45 Lyxell, & Kathleen Pichora-Fuller, 2009). In this field of research, difficult listening  
46 situations have mostly been operationalized by introducing acoustic degradations to the  
47 speech signal, such as introducing noise or removing spectral content of the signal.  
48 However, a few studies have addressed the syntactic structure of the speech material  
49 itself, arguing that syntactic processing difficulty also constitutes an adverse listening  
50 condition (Wingfield, McCoy, Pelle, Tun, & Cox, 2006; Wingfield, Pelle, & Grossman,  
51 2003).

52 Indeed, in cross-sectional research, and even in non-auditory studies, young and  
53 older adults usually differ in the quality of their language comprehension, with older  
54 adults exhibiting worse indicators of comprehension across a wide range of different  
55 measures (DeDe & Flax, 2016), such as slower reading times, difficulty in accessing  
56 infrequent words and in differentiating phonological neighbors, being slower in  
57 recognizing words, parsing sentences, and making more comprehension errors. All in all,  
58 there is ample cross-sectional evidence for between-group differences in language  
59 comprehension between younger and older adults. These mostly emerge not with simple  
60 language material, but when language material becomes more difficult to process (e.g.  
61 including double negation, comparatives, and doubly embedded relative clause  
62 sentences; Opler, Fein, Nicholas, & Albert, 1991, syntactically ambiguous garden-path  
63 sentences; Christianson, Williams, Zacks, & Ferreira, 2006; Kemper, Crow, & Kemtes,

64 2004, or non-prototypical animacy configurations; DeDe, 2015).

65       However, aging is a heterogeneous process (Lowsky, Olshansky, Bhattacharya, &  
66 Goldman, 2014) and chronological age can be understood "as a proxy for true  
67 mechanistic changes that influence functional capacity and adaptivity (including, but  
68 not limited to, cognition) across the lifetime" (S. W. S. MacDonald, DeCarlo, & Dixon,  
69 2011, p. i59). Following this line of thought, there should be inter-individual variables  
70 more successful in explaining language comprehension than chronological age. These  
71 other variables will most likely co-vary with chronological age, and therefore at least  
72 partly bring about the group differences between younger and older adults. A study by  
73 Bornkessel-Schlesewsky et al. (2015) already showed that in a sample of healthy older  
74 adults, inter-individual variability outweighed effects of age. In another study, DeCaro,  
75 Peelle, Grossman, and Wingfield (2016) found that age did not significantly improve the  
76 prediction of comprehension accuracy when working memory capacity and hearing  
77 acuity were already present in the model. There are multiple candidate variables that  
78 may be related to successful language processing in older adults, including perceptual  
79 abilities which decline with age, such as hearing acuity (DeDe & Flax, 2016) and  
80 temporal processing abilities (Pichora-Fuller, 2003) in the case of spoken language.  
81 Other candidate mechanisms include cognitive abilities like processing speed (Salthouse,  
82 1996), working memory (DeDe & Flax, 2016; Payne et al., 2014), inhibitory processes  
83 (Hasher & Zacks, 1988), and verbal fluency, which is thought to moderate the extent to  
84 which older adults use predictive processing (DeLong, Groppe, Urbach, & Kutas, 2012;  
85 Federmeier, McLennan, Ochoa, & Kutas, 2002).

86       All of these potential predictors have usually been investigated in separate studies  
87 and in single psycholinguistic paradigms. However, for the identification of key abilities  
88 that support speech comprehension in older adults, it is important to know whether  
89 there are overarching cognitive abilities that support speech comprehension in general,  
90 or whether different language processing challenges warrant involvement of different  
91 cognitive abilities. For our study, we thus chose two "classical" psycholinguistic  
92 paradigms. For an overview of the paradigms and the experimental conditions in our

93 study, please see Table 1. First, we selected the paradigm employed by Osterhout and  
94 Holcomb (1992). In the following, we will refer to this as the reduced relative clause  
95 (RRC) paradigm because it involves a syntactically ambiguous relative clause  
96 construction. It is well suited for our study because English reduced relative clauses  
97 belong to the family of *garden-path sentences*, in which the preferred analysis of an  
98 ambiguous sentence region leads to an incorrect reading that needs to be corrected  
99 later. It has been shown that, in comparison to younger adults, older adults have a  
100 stronger tendency to adopt a "good-enough" interpretation of garden-path sentences  
101 (Christianson et al., 2006).

Table 1

*Experimental Conditions*

| Paradigm | Condition | Example                                                                 |
|----------|-----------|-------------------------------------------------------------------------|
| RRC      | TVRR      | "The broker persuaded to sell the stock was sent to jail."              |
|          | TVDO      | "The broker persuaded the investor to sell the stock."                  |
|          | IVWR      | "The broker planned to sell the stock was sent to jail."                |
|          | IVCO      | "The broker planned to sell the stock."                                 |
| ORC      | ORAI      | "The musician that the accident terrified angered the policeman a lot." |
|          | ORIA      | "The accident that the musician witnessed angered the policeman a lot." |
|          | SRAI      | "The musician that witnessed the accident angered the policeman a lot." |
|          | SRIA      | "The accident that terrified the musician angered the policeman a lot." |

*Note.* This table shows the eight experimental conditions, clustered in the two paradigms, and lists an example sentence for each condition. RRC = reduced relative clause; ORC = object-relative clause; TVRR = transitive verb; reduced relative; TVDO = transitive verb, direct object; IVWR = intransitive verb, wrong; IVCO = intransitive verb, correct; ORAI = object-relative, animate - inanimate; ORIA = object-relative, inanimate - animate; SRAI = subject-relative, animate - inanimate; SRIA = subject-relative, inanimate - animate.

102 In a reduced relative clause (RRC) such as the TVRR example in Table 1, the  
103 ambiguous string *persuaded* – which is, in fact, a past participle – is initially interpreted  
104 as a past tense main clause verb (Bever, 1970). When *to* is subsequently encountered,

105 *persuaded* must be reanalysed as a past participle within an RRC. A "good-enough"  
106 interpretation, by contrast, refers to cases in which the initial reading is not fully  
107 revised in spite of the conflicting evidence, i.e. in the case of our TVRR example, the  
108 assumption that the broker persuaded (someone) to do something would be  
109 (incorrectly) maintained. Crucially for present purposes, the RRC paradigm in Table 1  
110 allows us to probe the extent to which participants reanalyse ambiguous RRC  
111 constructions. If a reanalysis has not taken place when the finite main clause verb (*was*)  
112 is encountered later in the sentence, it should render the sentence ungrammatical due to  
113 the slot of the main clause verb already having been filled by *persuaded*. This should  
114 engender an ungrammaticality-related response. A comparison between the TVRR and  
115 the IVWR sentences, which are indeed rendered ungrammatical at the position of *was*,  
116 can show the extent to which *persuaded* has been reinterpreted as a past participle. A  
117 second comparison, namely between TVRR vs. TVDO at the fourth word position (*to*  
118 vs *the*), shows the extent to which the initial disambiguation affects the well-formedness  
119 of the sentence.

120 For the second paradigm, we chose a variant of a manipulation that is commonly  
121 used in the current Cognitive Hearing Science literature. Most of the studies  
122 investigating relationships between language comprehension, syntactical processing, and  
123 aging have compared subject- and object-relative clause comprehension (Amichetti,  
124 White, & Wingfield, 2016; DeCaro et al., 2016; Wingfield et al., 2006). However, a  
125 considerable amount of evidence points to object-relative clauses not being more  
126 difficult to process than subject-relative clauses *per se*, but only when a certain animacy  
127 configuration is present, namely, when the subject of the main clause is animate and the  
128 subject of the object-relative clause is inanimate (DeDe, 2015; Traxler, Morris, & Seely,  
129 2002; Weckerly & Kutas, 1999). Therefore, we based our second paradigm on Traxler et  
130 al.'s (2002) object relative clause design with an animacy manipulation. We further  
131 refer to it as the object relative clause (ORC) paradigm. It allows us to test predictive  
132 processes during actor computation. Taking the example from Table 1, ORAI sentences  
133 have an animate subject in the main clause and an inanimate subject in the

134 object-relative clause, while the ORIA sentences have an inanimate subject in the main  
135 clause and an animate subject in the object-relative clause. Taking animacy as a  
136 prominence feature which strongly guides thematic role assignment  
137 (Bornkessel-Schlesewsky & Schlewsky, 2009), one would assume that the animate  
138 object-relative clause subject (e.g., the *musician*) in the ORIA sentences is a  
139 prototypical instantiation of the actor role (being the agent that does something to the  
140 inanimate main clause subject, e.g., the *accident*). By contrast, the inanimate  
141 object-relative clause subject (e.g., the *accident*) in the ORAI sentences does not  
142 correspond to a prototypical actor. If participants make use of the previous information  
143 (animacy of the main clause subject and the presence of an object-relative clause), they  
144 should therefore predict an animate object-relative clause subject in both the ORIA and  
145 the ORAI sentences. When that prediction is not fulfilled in the ORAI sentences, we  
146 should observe a response related to the prediction error (Bornkessel-Schlesewsky &  
147 Schlewsky, 2019).

148 Both our paradigms have reliably elicited inter-individual processing differences, as  
149 revealed by different indicators of processing difficulty. Kemper et al. (2004) found  
150 differences between high- and low-working-memory-span individuals in RRC processing,  
151 but no differences between age groups. However, Yoo and Dickey (2017) found a  
152 difference between younger and older adults during processing of reduced relative  
153 clauses, but neither working memory nor inhibition predicted the prolonged reading  
154 times. With regard to the ORC paradigm, Traxler, Williams, Blozis, and Morris (2005)  
155 showed that high-span subjects benefited more from animacy cues than low-span  
156 subjects. In an ERP study by Weckerly and Kutas (1999), there was only an N400  
157 effect in response to inanimate object-relative clause subjects as compared to animate  
158 object-relative clause subjects in high comprehenders (i.e. participants who scored  
159 higher than 75% on the comprehension task for ORCs), but not in low comprehenders.

160 To measure processing difficulties, previous studies employed methods of either  
161 response accuracy (comprehension questions, Amichetti et al., 2016; DeCaro et al.,  
162 2016; Wingfield et al., 2006), or reading/listening times (eye-tracking; Traxler et al.,

163 2002 and self-paced listening DeDe, 2015). Because we aimed for auditory presentation  
164 of our stimuli (thereby excluding reading measures), and because the RRC paradigm  
165 allowed for probing sentential processing at multiple points in time (thereby excluding  
166 end-of-sentence behavioral comprehension measures), we chose event-related potentials  
167 (ERPs) as our online sentence processing markers of choice. Both paradigms have  
168 previously been examined using ERPs. In the RRC paradigm, Osterhout and Holcomb  
169 (1992, 1993) observed P600 effects for both the reanalysis- and ungrammaticality  
170 related comparisons (i.e. for TVRR vs. TVDO and TVRR vs. IVWR, respectively).  
171 For the ORC paradigm, the study by Weckerly and Kutas (1999) revealed an N400  
172 effect for good comprehenders as noted above (cf. also Frisch & Schlesewsky, 2001).

173 An additional reason for using ERPs is that they have previously exhibited  
174 modulation by cognitive ability (Bornkessel, Fiebach, & Friederici, 2004; Kim, Oines, &  
175 Miyake, 2018; Nakano, Saron, & Swaab, 2010). Friederici, Steinhauer, Mecklinger, and  
176 Meyer (1998) showed a P600 at disambiguating positions in garden-path sentences for  
177 readers with a high working memory span, but not for readers with a low working  
178 memory span. Weckerly and Kutas (1999) observed an N400 at an inanimate  
179 object-relative clause subjects only for good comprehenders, and DeLong et al. (2012)  
180 reported a frontal positivity in response to constraint violations only in older adults  
181 with high verbal fluency.

## 182 **Predictors**

183 We selected several inter-individual predictors for ERP amplitude between the  
184 conditions to be compared. First, we chose peripheral hearing loss as measured by  
185 hearing thresholds. Hearing loss is highly prevalent in older adults – approximately 20%  
186 at age 60 and 50% at age 70 (Bisgaard & Ruf, 2017; Goman & Lin, 2016; Mick et al.,  
187 2019) – and hearing thresholds have been shown to influence many behavioral results in  
188 previous studies (DeCaro et al., 2016; DeDe & Flax, 2016; Wingfield et al., 2006), even  
189 in young adults (Ayasse, Penn, & Wingfield, 2019).

190 Second, we chose working memory capacity, which has featured prominently in



191 many studies on inter-individual differences in language comprehension (e.g. Bornkessel,  
192 Fiebach, & Friederici, 2004; Friederici et al., 1998; Nakano et al., 2010)

193 A third predictor was individual alpha frequency (IAF), the peak frequency within  
194 the EEG alpha band (approximately 8 to 13 Hz), which is known to vary between  
195 individuals (Klimesch, 1999). IAF has been shown to correlate with cognitive ability  
196 (Angelakis, Lubar, & Stathopoulou, 2004; Angelakis, Lubar, Stathopoulou, & Kounios,  
197 2004; Grandy, Werkle-Bergner, Chicherio, Lövdén, et al., 2013; Klimesch, Schimke, &  
198 Pfurtscheller, 1993; Mundy-Castle, 1958), and while it tends to decrease with age  
199 cross-sectionally, it is a stable neurophysiological trait (Grandy, Werkle-Bergner,  
200 Chicherio, Schmiedek, et al., 2013). We chose to investigate IAF because it is a rather  
201 general marker for cognitive ability, also reflected in its substantial correlation with the  
202 *g* factor of general intelligence (Grandy, Werkle-Bergner, Chicherio, Lövdén, et al.,  
203 2013) and because it has already been associated with individual differences in language  
204 processing (Bornkessel, Fiebach, & Friederici, 2004) as well as modulations of the late  
205 positivity in older adults (Bornkessel-Schlesewsky et al., 2015).

206 Lastly, we chose to investigate inhibition as a predictor for ERP amplitude.  
207 According to Hasher and Zacks (1988), inhibitory processes can serve as gatekeepers for  
208 working memory during language processing. These authors further proposed that the  
209 reduced efficiency of these processes in older adults may underlie the decline of  
210 cognitive abilities – including certain aspects of language processing – with increasing  
211 age. Inhibition, or executive control, has also been put forward as a mechanism to  
212 suppress an initial, preferred interpretation in favor of an alternative interpretation  
213 which better fits the sentential information (see Novick, Trueswell, & Thompson-Schill,  
214 2010, for a review). Furthermore, Vuong and Martin (2014) showed that verbal Stroop  
215 performance predicted correct garden-path revisions (although see Engelhardt, Nigg, &  
216 Ferreira, 2017, for a study where intelligence is a better predictor of garden-path  
217 comprehension accuracy than inhibition).

## 218 Study Design and Hypotheses

219 We aimed to investigate ERP amplitude in response to two classical psycholinguistic  
220 manipulations as a function of inter-individual differences in hearing and cognitive  
221 ability. If present, such a modulation would indicate different processing strategies,  
222 which in turn might explain the often-observed language comprehension benefits for  
223 older adults with better hearing and cognitive ability.

224 For the RRC paradigm, we first compared ERP amplitude in conditions TVRR and  
225 TVDO at the fourth position (...persuaded *to* vs. ...persuaded *the*). The amplitude of  
226 the P600 between the infinitival marker *to* in the TVRR sentences and the definite  
227 article *the* in the TVDO sentences indicates how strongly the interpretation of  
228 *persuaded* had been biased towards a past tense main clause verb.

229 Additionally, we repeated the analysis described in Osterhout and Holcomb (1992),  
230 comparing ERP amplitude in conditions IVWR and TVRR at the eighth position  
231 (...planned to... *was* vs. ...persuaded to... *was*, following the examples from Table 1).  
232 The auxiliary verbs at position eight in conditions IVWR und TVRR either rendered  
233 the sentence ungrammatical (IVWR) or continued the main clause (TVRR). Therefore,  
234 a comparison between these auxiliary verbs would reveal whether a successful reanalysis  
235 had previously taken place in condition TVRR. If it had, a finite main clause verb (such  
236 as an auxiliary) should be expected and therefore, one would expect a P600 for IVWR  
237 vs. TVRR to mark the ungrammaticality of the former. On the other hand, if a  
238 reanalysis had not taken place in the TVRR condition and *persuaded* was rather  
239 interpreted as a past tense main clause verb, both IVWR and TVRR should engender  
240 an ungrammaticality-related response at the position of the auxiliary and there should  
241 be no difference between the two conditions. Thus, the presence of a response for  
242 IVWR vs. TVRR at this position can be viewed as a marker of successful reanalysis  
243 towards a reduced relative clause earlier on in the sentence.

244 For the ORC paradigm, we followed the analysis by Weckerly and Kutas (1999).  
245 Specifically, we compared ERP amplitude in conditions ORAI and ORIA at the fifth  
246 position (The musician that the *accident*... vs. The accident that the *musician*...).

247 Weckerly and Kutas (1999) showed that an N400 was elicited for an inanimate relative  
248 clause subject compared to an animate relative clause subject, arguably resulting from  
249 the additional processing costs of assigning an actor role to an inanimate subject  
250 (Bornkessel & Schleewsky, 2006). Interestingly, this effect was only present in good  
251 comprehenders. Because comprehension accuracy of object-relative clauses has been  
252 shown to be associated with hearing loss and working memory capacity in older adults  
253 (DeCaro et al., 2016; Wingfield et al., 2006), it appears reasonable to assume that an  
254 N400 elicited after inanimate ORC subjects in comparison with animate ORC subjects  
255 may also be associated with these inter-individual variables.

256 As noted above, modulation of ERP amplitudes between different conditions by  
257 several inter-individual variables was of particular interest for this study. For the  
258 comparison between TVRR and TVDO sentences at the fourth position, we expected  
259 participants with (potentially) fewer resources available to exhibit higher P600s,  
260 meaning participants with higher hearing thresholds, lower working memory capacity,  
261 and lower IAF. We also expected participants with higher inhibition to exhibit higher  
262 P600s, because they would be more prone to suppress the second meaning of the  
263 ambiguous string *persuaded*, and would therefore be more surprised when encountering  
264 the unexpected continuation in the TVRR sentences.

265 For the second comparison, IVWR vs. TVRR, we expected participants with fewer  
266 resources to exhibit smaller P600s, because they might settle for a good-enough  
267 interpretation of the reduced relative clause and therefore show the same  
268 ungrammaticality response for the TVRR sentences at the eighth position as for the  
269 IVWR sentences. We assume that this again holds for participants with higher hearing  
270 thresholds, lower working memory capacity, and lower IAF.

271 Note that previous studies on older adults' ORC processing compared  
272 comprehension in subject- vs. object-relative clauses (e.g. Amichetti et al., 2016;  
273 DeCaro et al., 2016; Wingfield et al., 2006, 2003). The stimuli in these studies involved  
274 animate subjects for both the main and the relative clause. This arrangement results in  
275 competition for the actor role, which appears to be the feature which renders ORCs

276 difficult to process (DeDe, 2015; Traxler et al., 2002; Weckerly & Kutas, 1999). We  
277 decided to follow Weckerly and Kutas (1999) in comparing ORCs with an animacy  
278 manipulation. This conveniently solves the problem of otherwise having to compare  
279 noun phrases at different sentential positions. Although hearing thresholds and working  
280 memory have been found to predict ORC comprehension only when compared to SRC  
281 processing, we nevertheless hypothesize that they might also predict the sensitivity to  
282 animacy as a cue for sentence processing as reflected in the N400. We therefore  
283 hypothesized that lower hearing thresholds and higher working memory capacity would  
284 result in a larger N400 effect between ORAI and ORIA sentences.

285 It is possible that we might observe a modulation of ERP amplitudes by hearing  
286 thresholds and cognitive ability on the basis of altered auditory processing in general  
287 and not because of different processing strategies for linguistic material. If that were the  
288 case, we should also observe a modulation of earlier "pre-linguistic" auditory ERP  
289 amplitudes. To test for this association, we added a mismatch negativity (MMN;  
290 Näätänen, Pakarinen, Rinne, & Takegata, 2004) paradigm to the study. If hearing and  
291 cognitive abilities predict both MMN and N400/P600 amplitudes, this would suggest  
292 that hearing and/or cognitive ability affects auditory processing in general, and that  
293 this effect is not restricted to auditory sentence processing. If hearing and cognitive  
294 abilities only predict N400/P600 amplitudes, but not MMN amplitude, this would  
295 strengthen the argument that effects of hearing and cognition mainly come into play at  
296 later processing stages of sentence comprehension.

## 297 **Materials and Methods**

298 All data and code associated with the study will be made available on the Open  
299 Science Framework upon acceptance of the paper.

## 300 **Participants**

301 The sample consisted of 29 older adults (mean age = 66.14 yrs, sd = 3.70 yrs, range  
302 61 - 76). Three more older adults participated in the study but were excluded due to  
303 excessive EEG artifacts. All participants were right-handed and reported no psychiatric

304 or neurological disorders. Their native language was English and they had not learned  
305 another language before their seventh year of age. They did not wear a hearing aid and  
306 they reported not to have tinnitus. They also were not colorblind. Their peripheral  
307 hearing thresholds did not exceed 30 dB in the frequencies 0.5, 1, 2, and 4 kHz. They  
308 passed a screening session in which the exclusion criteria were tested via questionnaires.  
309 In order to exclude participants with Mild Cognitive Impairment, they were  
310 administered the Montreal Cognitive Assessment (MoCA; Nasreddine et al., 2005) and  
311 were invited to further participate in the study when they scored 26 points or more.

312 The study protocol was approved by the Human Research Ethics Committee of the  
313 University of South Australia. All participants gave written informed consent in  
314 accordance with the Declaration of Helsinki.

## 315 **Study Process**

316 The study consisted of one session which took about three hours to complete. After  
317 participants passed the screening (20 minutes), they completed four cognitive tasks:  
318 Two inhibition tasks (Stroop Task; Golden, 1976, and Eriksen-Flanker Task; Eriksen &  
319 Eriksen, 1974) and two working memory tasks (Reading (Sentence) Span (RS) and  
320 Operation Span (OS); modelled after Lewandowsky, Oberauer, Yang, & Ecker, 2010).  
321 Because the two working memory tasks were rather similar, they were administered in  
322 counterbalanced order. After that, participants took part in an EEG experiment which  
323 took about 45 minutes to complete. At the beginning and end of the EEG session,  
324 resting state EEG was measured (two minutes with eyes open, two minutes with eyes  
325 closed). After the first resting state session, a short MMN paradigm was administered,  
326 which took about three and a half minutes. After that, the main EEG task started. In  
327 this main task, participants listened to acoustically presented sentences and rated their  
328 acceptability. Participants received a 50 AUD Coles & Myer gift card for their  
329 participation.

### 330 **Hearing Thresholds**

331 The computer-based hearing tests were administered via a custom MATLAB  
332 software built upon the MAP auditory toolbox (Meddis et al., 2013). We measured  
333 absolute pure-tone hearing thresholds (pure-tone audiometry; PTA) by means of a  
334 probe-detection paradigm. Participants were played either one or two sine wave tones  
335 for 250 ms each and indicated whether they had heard two, one, or no sounds. The  
336 probe was always 10 dB SPL lower than the cue and the loudness of cue and probe was  
337 varied by means of an adaptive procedure. Participants practiced the task with sine  
338 wave tones of 1 kHz and were subsequently tested on frequencies 0.25, 0.5, 1, 2, 4, 6,  
339 and 8 kHz. The average hearing threshold for each participant was calculated by  
340 averaging the thresholds for 0.5, 1, 2, and 4 kHz. The measurement procedure and the  
341 stimuli have been described in detail elsewhere (Giroud et al., 2018; Lecluyse & Meddis,  
342 2009; Lecluyse, Tan, McFerran, & Meddis, 2013).

### 343 **Working Memory Tasks**

344 The two working memory task were a RS and an OS task. They were programmed  
345 in PsychoPy2 (Version 1.90.2) and modelled after Lewandowsky et al. (2010). Sentences  
346 were very easy to classify as “correct” or “false”, but not at first glance (example: “The  
347 earth is larger than the sun.”). The difficulty in this task was kept low because this  
348 improved the correspondence between the RS measure and a latent measure of working  
349 memory capacity (Lewandowsky et al., 2010). The equations in the OS task were also  
350 very easy (only addition and subtraction with one- or two-digit numbers; no subtraction  
351 with borrowing).

### 352 **Inhibition Tasks**

353 The Flanker task was also programmed in PsychoPy2 (Version 1.90.2). Participants  
354 were presented with 30 trials showing five arrows all pointing in the same direction, left  
355 or right (congruent), or the middle arrow pointing into the opposite direction than the  
356 other four (incongruent), or only one arrow pointing either left or right, with four

357 squares around it (neutral). The Flanker inhibition score was calculated by subtracting  
358 the mean reaction time to the incongruent stimuli from the mean reaction time to the  
359 congruent stimuli.

360 We used a pen-and-paper version of the Stroop task to obtain the Stroop  
361 interference score. Participants had 45 seconds each to work through three sheets.  
362 Sheet one consisted of the words RED, BLUE, and GREEN printed in black, and  
363 participants had to read those out aloud as fast as possible, which yielded score W  
364 (number of words read). Sheet two consisted of the characters “XXXX” printed in  
365 either red, blue, or green. Participants had to name the colors of the printed characters  
366 as fast as possible, which yielded the score C (number of colors named). Sheet three  
367 consisted of the words RED, BLUE, and GREEN printed in either red, blue, or green,  
368 but never in the color they represented. Pseudo-randomization of the order of words  
369 and colors was carried out via Mix (van Casteren & Davis, 2006). Participants again  
370 had to name the colors of the printed characters as fast as possible, which yielded the  
371 score CW (number of colors named). An interference score IG was calculated with the  
372 formulae  $P_{cw} = (W * C) / (W + C)$  and  $IG = CW - P_{cw}$  (Golden & Freshwater, 1978), which  
373 is the most commonly used Stroop interference score (Scarpina & Tagini, 2017).

### 374 **Sentence Stimuli**

375 In total, the main EEG experiment used 600 sentence stimuli. Stimuli were recorded  
376 by a male native speaker of Australian English (mean F0 = 98.44 Hz, sd = 5.17 Hz).  
377 Please see Table 1 for an overview of the experimental conditions.

378 Sentence materials for the RRC paradigm were taken from Osterhout and Holcomb  
379 (1992), Experiment 2. We adopted their conditions 1 (short intransitive verb sentences;  
380 IVCO), 3 (long, grammatically incorrect intransitive verb sentence; IVWR), and 4  
381 (reduced relative clause/long intransitive verb sentence; TVRR). However, instead of  
382 condition 2 in the original experiment, we chose to present sentences with a transitive  
383 verb and its direct object (condition TVDO), because, in contrast to condition 2 of  
384 Osterhout and Holcomb (1992), this resulted in a grammatically correct and



385 linguistically highly acceptable condition. This replacement was chosen in order to  
386 achieve an overall higher proportion of grammatically correct sentences in the whole  
387 experiment.

388 Sentence materials for the ORC paradigm were taken from Traxler et al. (2002),  
389 Experiment 3. We exactly adopted their four conditions, two of which contained  
390 subject-relative (SR) clauses and two of which contained object-relative (OR) clauses.  
391 These sub-divided conditions further differed with regard to the animacy of their main  
392 clause and relative clause subjects. In the SRAI and the ORAI conditions, the main  
393 clause subject was animate and the relative clause subject was inanimate, while in the  
394 SRIA and the ORIA conditions, the main clause subject was inanimate and the relative  
395 clause subject was animate. As Traxler et al.'s original experiment only contained 28  
396 sentences per condition, we added two more sets of sentences. Because both paradigms  
397 contained sentence materials that were not part of the original studies, all sentences for  
398 both paradigms can be found in Supplementary Tables S1-S8.

399 Participants were presented with 240 sentences, subdivided into eight blocks of 30  
400 sentences each. Each participant was presented with all of the sentences in the ORC  
401 paradigm (30 per condition). Because there were 120 stimuli available for each  
402 condition of the RRC paradigm (480 in total), we subdivided these into four lists of 120  
403 sentences (30 sentences per condition) using a Latin Square design. List presentation  
404 was counterbalanced across participants, with each participant presented with one of  
405 the four lists, interspersed with the ORC sentences. Pseudo-randomization of trials was  
406 carried out via Mix (van Casteren & Davis, 2006), with the constraint that sentences  
407 from one condition must not be played directly after one another.

#### 408 **Test for Differences in Speech Parameters Between Conditions**

409 In order to test for differences in speech parameters at the word positions of interest  
410 between the conditions, we extracted mean F0 (pitch), duration, and mean intensity via  
411 a custom-written Praat (Boersma & van Heuven, 2001) script and compared them using  
412 Welch two-sample t-tests. Table 2 shows the mean values per condition for each word



413 positions of interest as well as t-test results. Speech parameters at the word positions of  
 414 interest did not differ significantly between conditions, there was only a significant  
 415 difference in intensity at word position 4 between the TVRR and TVDO conditions (*to*  
 416 *vs. the*). However, that difference was just slightly above 1 dB (-1.25 dB) and, due to  
 417 the very short duration of the words, most likely not perceivable by our participants.  
 418 Even if it had been perceivable, this should not discredit our results, because we did not  
 419 aim for complete indistinctiveness of the conditions, but we rather were interested in  
 420 how participants would differentially utilize these cues for comprehension.

Table 2

*Pitch, duration, and intensity comparison of critical word positions*

|      | w.pos | pitch [Hz] |        |        |        | duration [s] |        |        |        | intensity [dB SPL] |        |        |        |
|------|-------|------------|--------|--------|--------|--------------|--------|--------|--------|--------------------|--------|--------|--------|
|      |       | m          | t      | df     | p      | m            | t      | df     | p      | m                  | t      | df     | p      |
| TVRR | 4     | 92.43      | -0.917 | 128.07 | 0.3608 | 0.11         | 1.022  | 234.37 | 0.308  | 65.71              | -5.922 | 234.78 | <.001  |
| TVDO | 4     | 90.78      |        |        |        | 0.11         |        |        |        | 64.46              |        |        |        |
| IVWR | 8     | 84.31      | -1.722 | 227.33 | 0.087  | 0.19         | -0.219 | 229.27 | 0.8273 | 64.73              | 0.221  | 231.96 | 0.8251 |
| TVRR | 8     | 85.16      |        |        |        | 0.19         |        |        |        | 64.69              |        |        |        |
| ORAI | 5     | 102.14     | 1.335  | 57.784 | 0.1871 | 0.39         | -1.050 | 49.361 | 0.299  | 69.17              | -0.595 | 58     | 0.5545 |
| ORIA | 5     | 99.76      |        |        |        | 0.41         |        |        |        | 69.42              |        |        |        |

*Note.* This table shows the mean values per condition for pitch, duration, and intensity of each word positions of interest as well as the results of the Welch two-sample t-tests used to compare them.

421 **Procedure**

422 At the beginning of each trial, an asterisk was presented on the screen for 500 ms,  
 423 after which auditory presentation of the sentence commenced. The asterisk continued to  
 424 be displayed throughout the auditory presentation of the sentence. After a gap of 500  
 425 ms after the sentence had ended, participants were prompted to rate the acceptability  
 426 of the sentence on a scale from 1 ("The sentence was not a good English sentence at  
 427 all") to 4 ("The sentence was a very good English sentence"). Participants had 4 seconds  
 428 to respond to the question by means of a keyboard button press. If they did not

429 respond within this time frame, the next trial began. The inter-trial interval was 1500  
430 ms long. Between blocks, participants took self-paced breaks.

431 Before testing started, participants were given a set of eight items as a practice  
432 block. These eight items contained two sentences per condition from a subset of the  
433 RRC paradigm which was not presented to the participant later. During the practice  
434 block, participants' response behavior was monitored and the task was explained again  
435 if necessary (e.g. if the participant never responded to the practice items or if the  
436 participant always responded with the same button). After the practice session,  
437 participants were encouraged to attenuate or amplify the stimuli in order to obtain a  
438 comfortable sound level.

#### 439 **EEG Recording and Preprocessing**

440 Participants' EEG was recorded continuously from 59 Ag/AgCl electrodes  
441 (ActiCAP, Brain Products) with a BrainVision actiCHamp Active Electrodes amplifier  
442 system (Brain Products GmbH, Gilching, Germany) at 500 Hz. The electrodes were  
443 spaced according to the 10–20 system, with FT9, FT10, Fp1, Fp2, and TP9 missing  
444 because these electrodes were used for other purposes (electrooculogram (EOG) and  
445 reference). For monitoring eye movements and blinks, the horizontal and vertical EOG  
446 was recorded with supra- and infraorbital electrodes on the left eye and two electrodes  
447 placed next to the external canthi of the left and right eyes. Impedances were reduced  
448 below 25 kOhm. A forehead ground (Fz) and a left mastoid reference (TP9) were used.  
449 Data were analyzed in MATLAB Release 2016b (The MathWorks, Inc., Natick,  
450 Massachusetts, United States) using the FieldTrip Toolbox (Version 20190419;  
451 Oostenveld, Fries, Maris, & Schoffelen, 2011). For pre-processing, data were first  
452 visually screened for noisy channels. Afterwards, trials were defined, starting 2000 ms  
453 before sentence onset and ending 500 ms after the end of the sentence. After that, an  
454 automatic artifact rejection (AAR) procedure was employed. For AAR, data were first  
455 filtered between 0.1 and 10 Hz and z-values were computed for each trial. Trials that  
456 exhibited a z-value higher than a certain threshold (mostly 60, but this had to be

457 adjusted for some participants) were marked as bad trials. In parallel, data were filtered  
458 between 110 and 140 Hz and again, z-values were computed for each trial. Filtering  
459 took place within such a high frequency range in order to specifically identify trials that  
460 contained muscle activity. Again, trials that exhibited a z-value higher than a certain  
461 threshold (mostly 30, but this had to be adjusted for some participants) were marked as  
462 bad trials. After identification of bad channels and trials, the continuous data was read  
463 from disk, filtered between 0.1 and 30 Hz with a non-causal zero-phase two-pass 5th  
464 order Butterworth IIR filter with -6 dB half-amplitude cutoff. Then, data was  
465 segmented into trials, without the ones marked as bad in the earlier pre-processing step.  
466 A vertical and a horizontal eye channel were computed as difference waves between the  
467 two vertical and two horizontal eye electrodes. Then, data were submitted to an  
468 Independent Component Analysis (ICA; Jung et al., 2000) in order to extract and  
469 subsequently exclude components related to eye movement, remaining muscle activity,  
470 and heartbeat. For the ICA, data were high-pass filtered at 1 Hz in order to improve  
471 stationarity of the components. After the removal of artefactual components, the  
472 remaining components were back-projected to the original, 0.1-Hz-filtered data. Then,  
473 data were visually screened for trials that contained artifacts that survived the AAR  
474 and the ICA procedures, which were then removed.

475 For each participant, each condition, each trial, and each channel, we extracted  
476 three mean voltage values of interest: in a pre-stimulus time window (150 - 5 ms before  
477 the onset of the critical word), in the N400 time window (300 - 500 ms after onset of the  
478 critical word), and in the P600 time window (600 - 900 ms after onset of the critical  
479 word). These values were not baseline corrected, because we included the pre-stimulus  
480 activity as a factor in the analysis (for a description of this method see Alday, 2019).  
481 Critical words were at the fourth position in conditions TVRR and TVDO, at the  
482 eighth position in conditions IVWR and TVRR, and at the fifth position in conditions  
483 ORAI and ORIA.

484 **IAF**

485 IAF was quantified from participants' eyes-closed resting state EEG before and after  
486 the experiment. The two-minute segments were cut into 60 two-second trials. Data  
487 were band-pass filtered between 0.1 and 30 Hz with a non-causal zero-phase two-pass  
488 5th order Butterworth IIR filter with -6 dB half-amplitude cutoff and re-referenced to  
489 linked mastoids. Then, only eye channels and only 9 postero-occipital channels (Pz, P1,  
490 P2, POz, PO3, PO4, Oz, O1, O2) were retained. A vertical and a horizontal eye  
491 channel were computed as difference waves between the two vertical and two horizontal  
492 eye electrodes, respectively. An automatic artifact rejection procedure computed  
493 z-values in the horizontal and vertical eye channels per time point per trial and if a  
494 z-value at any time point in a trial exceeded 4, this trial was marked as bad. If any of  
495 the chosen channels had been marked as a bad channel in the main experiment (see  
496 above), they were interpolated using spline interpolation (Perrin, Pernier, Bertnard,  
497 Giard, & Echallier, 1987). With the *restingIAF* function from the *restingIAF* toolbox  
498 (Corcoran, Alday, Schlesewsky, & Bornkessel-Schlesewsky, 2018), we calculated power  
499 spectral density between one and 30 Hz for each channel and smoothed them with a  
500 Savitzky-Golay filter (Savitzky & Golay, 1964, with a frame width of 11 and a  
501 polynomial degree of 5). The function looked for evidence for peak activity in the  
502 smoothed power spectra between 5 and 14 Hz and quantified IAF for each channel  
503 following the peak alpha frequency as well as the centre of gravity methods. In order for  
504 the function to yield an average IAF quantification, a minimum of three channels had  
505 to yield an individual quantification. IAF estimates before and after the main  
506 experiment were averaged. Peak alpha frequency and centre of gravity IAF  
507 quantifications were highly correlated ( $r(24) = 0.94$ ,  $p < 0.001$ ), but the centre of  
508 gravity method yielded an IAF value for 30 of the 32 participants, while the peak alpha  
509 frequency method only yielded an IAF value for 26 participants. We therefore chose  
510 centre of gravity IAF for further calculations. The IAF of the two participants without  
511 estimate was interpolated with the median IAF of the whole sample.

512 **MMN**

513 For a quantification of participants' MMN, we presented participants the Passive  
514 Auditory Oddball MMN paradigm from the ERP CORE package by Emily S.  
515 Kappenman and Steven J. Luck while their EEG was recorded. Participants listened to  
516 a total of 290 1000 Hz sine wave tones with a duration of 100 ms including 5 ms rise  
517 and fall times, 230 of which were presented at a standard volume of 80 dB and 60 of  
518 which were presented at a deviant volume of 70 dB. The inter-stimulus interval was  
519 jittered between 450 and 550 ms. Before the experimental trials, the standard sine wave  
520 tone was presented in ten warm-up trials, which were excluded from the analysis.  
521 Participants were instructed to watch a silent movie during the presentation of the  
522 sounds. During preprocessing, the EEG was first band-pass filtered between 0.1 and 30  
523 Hz with a non-causal zero-phase two-pass 5th order Butterworth IIR filter with -6 dB  
524 half-amplitude cutoff and segmented into trials of 580 ms length; a 200 ms prestimulus  
525 baseline and 380 ms after stimulus onset. Then, a vertical and a horizontal eye channel  
526 were computed as difference waves between the two vertical and two horizontal eye  
527 electrodes, respectively. Then, the same automatic artifact rejection procedure as in the  
528 IAF quantification was applied, and any channels marked as bad in the main  
529 experiment (see above) were interpolated using spline interpolation (Perrin et al., 1987).  
530 Furthermore, data were re-referenced to linked mastoids. Following Duncan et al.  
531 (2009), we chose a frontocentral cluster encompassing Fc, FCz, Cz, FC1, and FC2 as  
532 the location of the MMN. The difference wave of ERP traces in response to deviant vs.  
533 standard tones was calculated and averaged across all channels of the MMN cluster per  
534 participant. We quantified the MMN as the negative peak amplitude measured between  
535 110 and 180 ms after sound onset.

536 **Statistical Analyses**

537 Behavioral and EEG data were analyzed in R Version 3.6.2 (R Core Team, 2018).  
538 Linear mixed effects models (LMEMs) were fitted using the package *lme4* (Bates,  
539 Mächler, Bolker, & Walker, 2015).

540 For the analysis of differences in acceptability scores between the conditions in the  
541 RRC and ORC paradigms, two separate LMEMs with repeated contrasts were run. A  
542 repeated contrasts model has the advantage of only comparing neighboring factors,  
543 thereby reducing the number of statistical tests (Schad, Vasishth, Hohenstein, & Kliegl,  
544 2020).

545 For the ERP analysis, in order to reduce the levels of the channel dimension of the  
546 EEG data while still remaining free of assumptions regarding the topography of our  
547 effects to avoid "double dipping" (Kriegeskorte, Simmons, Bellgowan, & Baker, 2009),  
548 channels were clustered regarding the two factors laterality (left: F7, F5, F3, FC5, FC3,  
549 T7, C5, C3, TP7, CP5, CP3, P7, P5, P3, PO7, PO3, FT7; medial: F1, F2, Fz, FCz,  
550 FC1, FC2, C1, C2, Cz, CP1, CP2, CPz, P1, P2, Pz, POz; right: F8, F6, F4, FC6, FC4,  
551 T8, C6, C4, TP8, CP6, CP4, P8, P6, P4, PO8, PO4) and sagittality (anterior: F7/8,  
552 F5/6, F3/4, F1/2, Fz, FC5/6, FC3/4, FC1/2, FCz, FT7/8, T7/8, C5/6, C3/4, C1/2,  
553 Cz; posterior: TP7/8, CP5/6, CP3/4, CP1/2, CPz, P7/8, P5/6, P3/4, P1/2, Pz,  
554 PO7/8, PO3/4, POz), and voltage values per cluster were obtained by averaging across  
555 channels.

556 We fitted LMEMs to predict ERP amplitude in the N400 (ORAI-ORIA comparison)  
557 and P600 (TVRR-TVDO and IVWR-TVRR comparisons) time windows on a  
558 trial-by-trial basis.

559 We first fitted a basic model for each comparison, predicting N400 or P600  
560 amplitude. The models always included a factor of condition with two levels, thereby  
561 mimicking a direct comparison between conditions, like traditional ERP analyses. The  
562 factor *condition* was encoded via treatment coding, with the "baseline" conditions  
563 (TVDO in the TVRR-TVDO comparison, TVRR in the IVWR-TVRR comparison, and  
564 ORIA in the ORAI-ORIA comparison) being coded as 0 and the  
565 ERP-component-eliciting condition being coded as 1. Other fixed effects were  
566 pre-stimulus amplitude (Alday, 2019; Alday, Schlesewsky, & Bornkessel-Schlesewsky,  
567 2017), an interaction term between pre-stimulus amplitude and condition, and full main  
568 effects as well as interactions of condition, laterality, and sagittality. Laterality and

569 sagittality were encoded via sum coding. Random factors included a random slope of  
570 condition per participant as well as random intercepts of participant and item. Please  
571 note that *item* denotes a single sentence and not a sentence cluster. This is a  
572 prototypical model formula for the basic models:  $\text{ERP amplitude} \sim \text{prestim} * \text{condition}$   
573  $+ \text{condition} * \text{laterality} * \text{sagittality} + (\text{condition} | \text{participant}) + (1 | \text{item})$ .

574 To investigate a potential moderating influence of our variables of interest (VOI),  
575 which consisted of PTA, RS, OS, IAF, Flanker, and Stroop (see Table 3 for a  
576 correlation matrix of the VOI as well as age), we updated the basic models by adding  
577 each VOI separately to the interaction term of condition, laterality, and sagittality. In  
578 the PTA models, participant-controlled attenuation/amplification residualized for PTA  
579 was also added to the models as a fixed effect, to control for effects due to insufficient  
580 amplification of the stimuli. Random factors included a random slope of condition per  
581 participant as well as random intercepts of participant and item. The prototype of all  
582 formulae was as follows:  $\text{ERP amplitude} \sim \text{prestim} * \text{condition} + \text{condition} * \text{laterality}$   
583  $* \text{sagittality} * \text{VOI} + (\text{condition} | \text{participant}) + (1 | \text{item})$ .

Table 3

*Correlation Matrix of Variables of Interest*

|         | age   | PTA    | RS      | OS    | IAF  | Flanker |
|---------|-------|--------|---------|-------|------|---------|
| age     |       |        |         |       |      |         |
| PTA     | 0.30  |        |         |       |      |         |
| RS      | -0.09 | -0.38* |         |       |      |         |
| OS      | -0.16 | -0.20  | 0.60*** |       |      |         |
| IAF     | -0.27 | 0.04   | -0.03   | 0.04  |      |         |
| Flanker | 0.12  | 0.07   | 0.00    | -0.24 | 0.02 |         |
| Stroop  | -0.31 | -0.06  | -0.04   | -0.11 | 0.26 | -0.17   |

*Note.* This table shows the correlations between our variables of interest. \* $p < .05$ . \*\* $p < .01$ .  
\*\*\* $p < .001$ .

584 We chose to report and interpret only models that fulfil the following criteria: First,  
585 we needed to make sure that our VOI is indeed a better predictor than chronological

586 age. Therefore, the model with a certain of our variables of interest needed to have a  
587 better fit as measured by the Akaike Information Criterion (AIC; Akaike, 1974) to the  
588 data than chronological age. Second, the model needed to exhibit at least one  
589 significant interaction effect between condition and the VOI, signaling a moderation of  
590 ERP amplitude by the VOI. Although only the models which fulfil these criteria are  
591 reported in the text, all fitted models are reported in Supplementary Tables S9-S32.

592 Finally, we calculated Pearson correlations between MMN amplitude and each of the  
593 VOI.

594 We further analyzed how our VOI would predict acceptability ratings of the  
595 sentences in the conditions we analyzed the ERPs from. To this end, cumulative link  
596 mixed models (CLMMs) were fitted by means of the *ordinal* package (Christensen,  
597 2019) with the following formula:  $\text{rating} \sim \text{condition} * \text{VOI} + (\text{condition}|\text{participant})$   
598  $+ (1|\text{item})$ .

## 599 Results

### 600 Behavioral Results

601 For the LMEMs with repeated contrasts used to test for differences in the  
602 acceptability ratings between the conditions in the RRC paradigm, the conditions were  
603 ordered as follows: We expected the lowest ratings for the grammatically incorrect  
604 IVWR sentences, the second-lowest ratings for the temporarily ambiguous TVRR  
605 sentences, the second-highest ratings for the TVDO sentences, and the highest ratings  
606 for the IVCO sentences. The difference between IVWR and TVRR ratings was  
607 significant ( $b = 0.71$ ,  $t(84) = 7.11$ ,  $p < 0.001$ ), as was the difference between TVRR and  
608 TVDO ratings ( $b = 0.41$ ,  $t(84) = 4.14$ ,  $p < 0.001$ ). The difference between TVDO and  
609 IVCO ratings was not significant ( $b = 0.18$ ,  $t(84) = 1.81$ ,  $p = 0.07$ ). Scores are shown  
610 in Figure 1, left panel.

611 For the ORC paradigm, the conditions were ordered as follows: We expected the  
612 lowest ratings for the ORAI sentences, the second-lowest ratings for the ORIA  
613 sentences, the second-highest ratings for the SRIA sentences, and the highest ratings for



614 the SRAI sentences. The difference between ORAI and ORIA ratings was significant ( $b$   
615 = 1.06,  $t(84) = 15.12$ ,  $p < 0.001$ ), but the difference between ORIA and SRIA ratings  
616 was not ( $b = 0.10$ ,  $t(84) = 1.38$ ,  $p = 0.17$ ). The difference between SRIA and SRAI  
617 ratings was significant ( $b = 0.14$ ,  $t(84) = 2.00$ ,  $p = 0.049$ ). Scores are shown in Figure  
618 1, right panel.

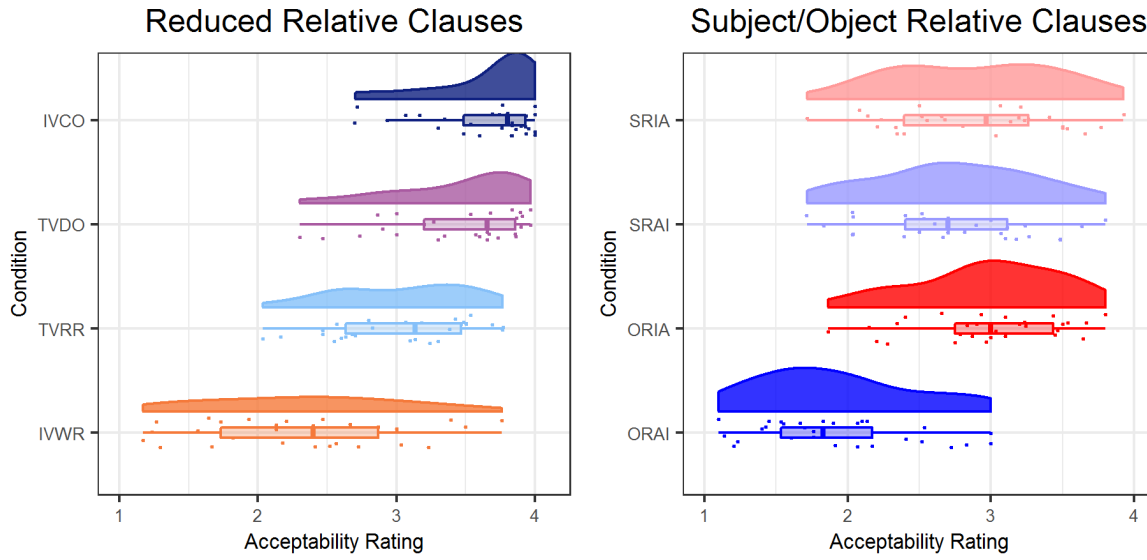

Figure 1. This figure shows the distributions of acceptability ratings in the RRC (left) and ORC (right) paradigms.

## 619 ERP Results

620 **RRC: TVRR-TVDO Comparison.** The first comparison in the RRC paradigm  
621 addressed ERP amplitude in the P600 time window in response to the fourth position  
622 in the TVRR sentences vs. the TVDO sentences ("The broker persuaded *to...*" vs. "The  
623 broker persuaded *the...*").

624 The basic model did not contain a significant main effect of condition nor a  
625 significant interaction effect between condition and laterality or sagittality (see also  
626 Figure 2). However, this was not a hindrance for the following analyses, because the  
627 aim of the present study was to identify variables that would distinguish between  
628 participants who show a P600 and those who do not.

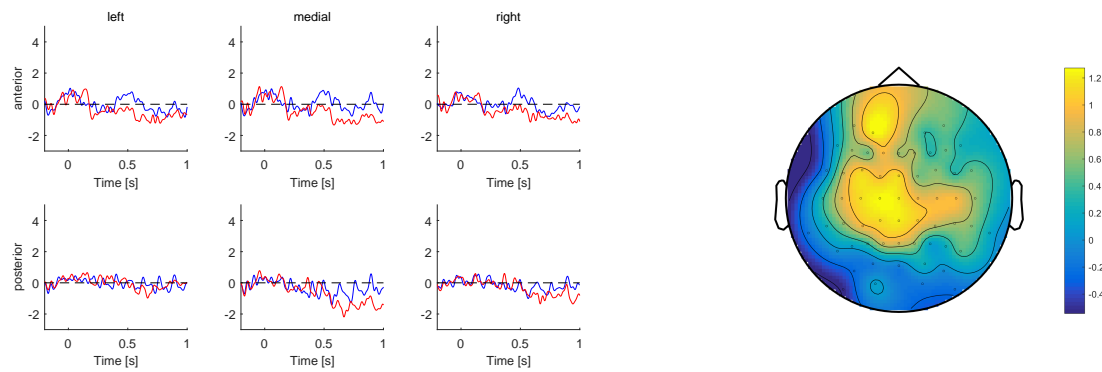

Figure 2. Left: Grand average ERPs centered at the start of the word at position 4 of TVRR (blue) vs. TVDO (red) sentences. Right: Topographic map of difference wave voltage in  $\mu\text{V}$  averaged across the P600 time window (500-900 ms after critical word onset)

629 Regarding the models containing the VOI, we first compared the fitted models to  
630 the same model fitted with age instead of the VOI and only kept those models that had  
631 a lower AIC than the model with age (see Table 4 for an overview of evidence ratios;  
632 Wagenmakers & Farrell, 2004). In the TVRR-TVDO comparison, all VOI models  
633 except for the IAF model had a lower AIC than the age model.

634 In a second step, we checked whether the remaining models contained a significant  
635 interaction effect between condition and the VOI, signaling a moderation of ERP  
636 amplitude by the VOI. Only the PTA and RS models contained a significant interaction  
637 effect with condition. Effects plots of the interactions can be found in Figure 5. To view  
638 these effects for each cluster separately, see Supplementary Figure S1.

639 In the PTA model, the interaction effect of condition and PTA was significant,  $b =$   
640  $0.65$ ,  $t(27.97) = 2.39$ ,  $p = 0.02$ . Across the topography, participants with higher hearing  
641 thresholds (i.e. worse hearing) exhibited a larger P600 than participants with lower  
642 hearing thresholds (i.e. better hearing).

643 In the RS model, the interaction effect of condition and RS was significant,  $b =$   
644  $-0.68$ ,  $t(28.98) = -2.44$ ,  $p = 0.02$ . Across the topography, participants with higher RS  
645 scores (i.e. better working memory) exhibited a smaller P600 than participants with

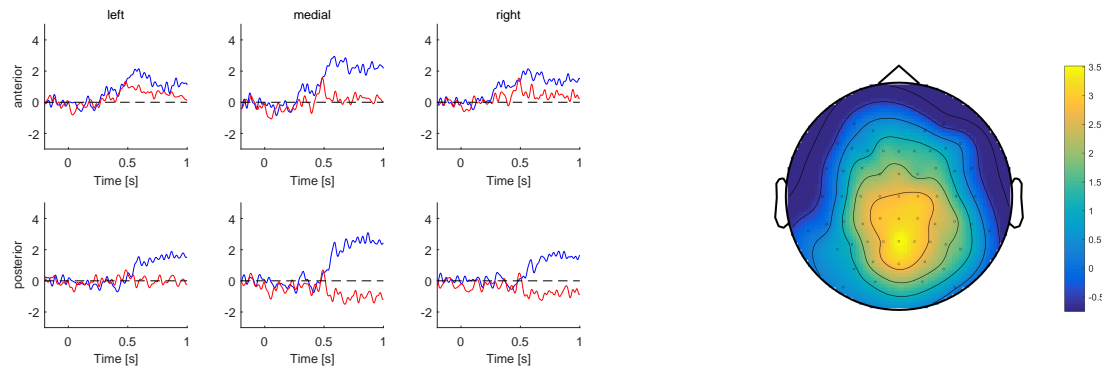

Figure 3. Left: Grand average ERPs centered at the start of the word at position 8 of IVWR (blue) vs. TVRR (red) sentences. Right: Topographic map of difference wave voltage in  $\mu\text{V}$  averaged across the P600 time window (500-900 ms after critical word onset)

646 lower RS scores (i.e. worse working memory).

647 **RRC: IVWR-TVRR Comparison.** The second comparison in the RRC  
648 paradigm involved the eighth position of the IVWR sentences vs. the TVRR sentences  
649 ("The broker persuaded to sell the stock *was...*" vs. "The broker planned to sell the  
650 stock *was...*").

651 The basic model contained significant interaction effects between condition and  
652 laterality (medial),  $b = 0.40$ ,  $t(4292.78) = 2.10$ ,  $p = 0.04$ , and between condition and  
653 sagittality,  $b = 0.45$ ,  $t(4296.97) = 3.36$ ,  $p = 0.001$ , indicating that the IVWR sentences  
654 were more positive than the TVRR sentences at medial as well as posterior channels  
655 (see also Figure 3). IVWR sentences relative to TVRR sentences elicited a P600 at the  
656 eighth position.

657 By comparing the models fitted with the VOI to the same model fitted with age  
658 instead of the VOI, we found that PTA, RS, and IAF had a lower AIC than the age  
659 model. Only the IAF model contained a significant interaction effect with condition.  
660 An effects plot of the models can be found in Figure 5.

661 In the IAF model, there was a significant interaction effect of condition and IAF,  $b$   
662  $= 0.85$ ,  $t(27.20) = 2.46$ ,  $p = 0.02$ . Across the topography, participants with a higher  
663 IAF exhibited a larger P600 than participants with a lower IAF.

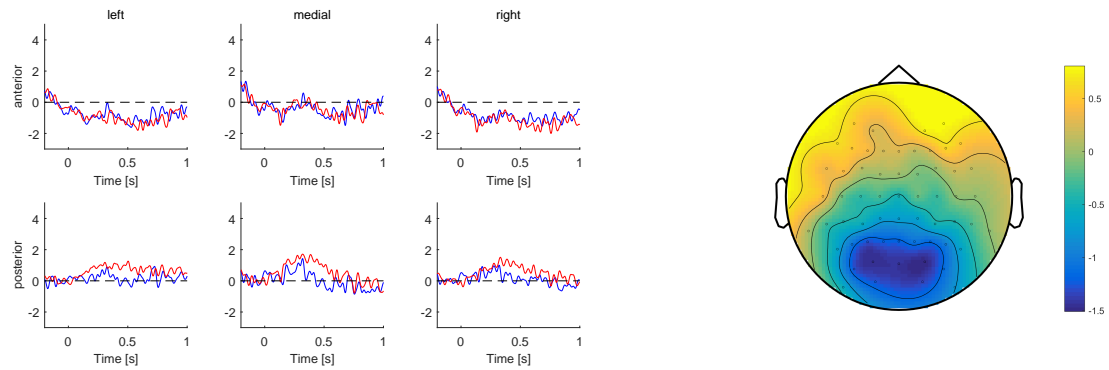

Figure 4. Right: Grand average ERPs centered at the start of the word at position 5 of ORAI (blue) vs. ORIA (red) sentences. Right: Topographic map of difference wave voltage in  $\mu\text{V}$  averaged across the N400 time window (300-500 ms after critical word onset)

664 **ORC.** ERP amplitudes in response to the fifth position of ORIA vs. ORAI  
665 sentences were compared ("The accident that the *musician*..." vs. "The musician that  
666 the *accident*..."). This comparison took place in the N400 time window.

667 The basic model did not contain a significant main effect of condition nor a  
668 significant interaction effect between condition and laterality or sagittality (see also  
669 Figure 4).

670 By comparing the models fitted with the VOI to the same model fitted with age  
671 instead of the VOI, we found that all VOI models except for the PTA model had a  
672 lower AIC than the age models. However, none of the models contained a significant  
673 interaction effect between condition and the VOI.

674 **MMN.** The grand averages of the MMN experiment and the topography of the  
675 difference wave are shown in Figure 6. We first tested for the presence of the MMN by  
676 running a one-sample two-sided t-test of the MMN amplitude against zero. The test  
677 showed that MMN amplitude was significantly lower than zero,  $m = -4.66$ ,  $t(31) =$   
678  $-10.61$ ,  $p < 0.001$ .

679 In a next step, we calculated six Person correlations between MMN amplitude and  
680 each of the VOI. None of the correlation coefficients was significant. There was no  
681 evidence for a modulation of the MMN by hearing thresholds or cognitive ability.



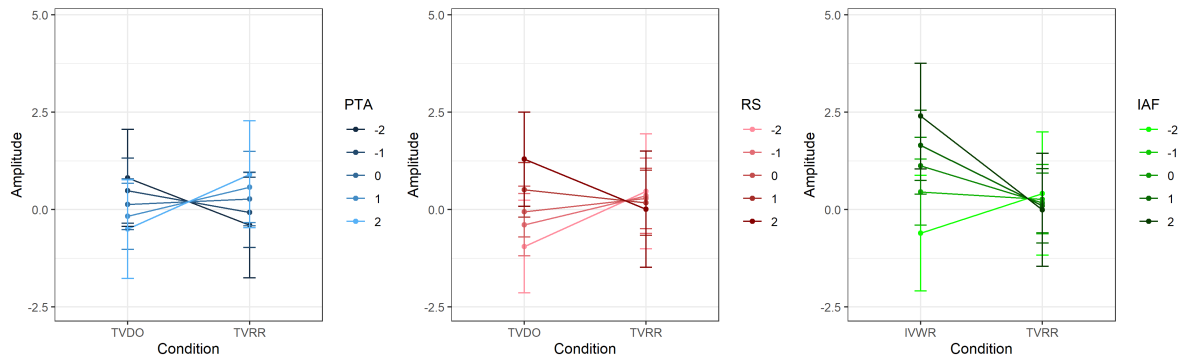

Figure 5. Effects plots of P600 amplitude of the models with a significant condition\*VOI interaction. VOI values were z-scored. Left: Effects plot of P600 amplitude by condition\*PTA interaction. Middle: Effects plot of P600 amplitude by condition\*RS interaction. Right: Effects plot of P600 amplitude by condition\*IAF interaction.

#### 695 Individual Differences in Reduced Relative Clause Processing

696 Starting with the reanalysis paradigm, we found a clear acceptability hierarchy in  
697 our four conditions. The unproblematic IVCO (intransitive verb, correct) and TVDO  
698 (transitive verb, direct object) sentences were rated highest, followed by the temporarily  
699 ambiguous TVRR (transitive verb, reduced relative) sentences, and then by the  
700 grammatically incorrect IVWR (intransitive verb, wrong) sentences.

701 In the ERP analysis, we probed processing of the TVRR sentences at two points in  
702 time. First, we compared ERPs in response to the word at the fourth position of the  
703 TVRR sentences (i.e. right at that point in time when the ambiguity was resolved) to  
704 ERPs in response to the word at the fourth position of the TVDO sentences, which  
705 began in the same way as the TVRR sentences, but continued with the preferred  
706 interpretation. Across the sample, there was no significant difference between the two  
707 conditions in the P600 time window. This was not a hindrance for the following  
708 analyses, because it is entirely possible that there was no difference in the grand average  
709 means because there were more participants who did not show a P600 effect than  
710 participants who did show a P600 effect. The aim of the present study was to identify  
711 variables that would distinguish between these participants. The analyses involving our

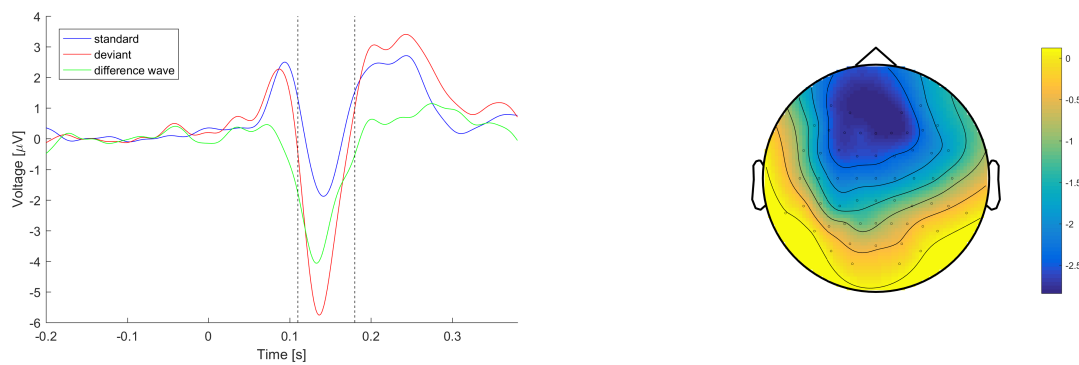

*Figure 6.* Left: Grand average ERP traces in response to the standard (blue) and deviant (red) sounds as well as the difference wave of the two traces (green). Right: Topographic map of difference wave voltage in  $\mu$ V between 110 and 180 ms after sound onset

712 participant-level VOI (hearing thresholds, working memory, IAF, and inhibition)  
713 revealed that participants with worse peripheral hearing and participants with lower  
714 working memory capacity exhibited a P600 effect in response to TVRR sentences  
715 relative to TVDO sentences. Both of these effects were not specific to any topographical  
716 region, but were distributed broadly across the scalp.

717 Second, we compared ERPs in response to the eighth position of the TVRR  
718 sentences to ERPs in response to the eighth position of the IVWR sentences. This  
719 comparison allowed us to test for successful reanalysis of the TVRR sentences towards  
720 the dispreferred RRC interpretation. If reanalysis of the TVRR had been successful, the  
721 "was" at the eighth position would be a necessary component of the sentence. If  
722 reanalysis had not been successful, and instead, participants had gone with a  
723 "good-enough" interpretation of the sentence up until that point, then the "was" would  
724 render the sentence ungrammatical, just as in the IVWR condition. This in turn  
725 implies that a between-condition difference in the ERPs in the P600 time window would  
726 be indicative of reanalysis success: if there is no difference, reanalysis was unsuccessful,  
727 whereas if there is a difference, reanalysis was successful. Across the sample, there was a  
728 significant difference between the conditions at medial and posterior channels, thus  
729 indicating that, overall, our participants could discriminate between the temporarily

730 ambiguous TVRR sentences and the ungrammatical IVWR sentences. This is also  
731 reflected in the significant difference in acceptability ratings between the two conditions.

732 We again tested whether our VOI would predict the ERP difference between the  
733 conditions. Participants with a higher IAF exhibited a higher P600 effect than  
734 participants with a lower IAF. This suggests that participants with a higher IAF were  
735 more successful in reanalysis. In summary, we found that hearing thresholds, working  
736 memory, and IAF predicted reduced relative clause processing at different stages.  
737 Inhibition, by contrast, was not found to modulate the amplitude of ERP indicators of  
738 reduced relative clause processing.

739 Overall, an interesting pattern emerged from these two complementary analyses.  
740 The comparison at the first point in time revealed stronger effects for participants with  
741 worse hearing and lower working memory capacity. On the other hand, at the second  
742 point in time, the effects were stronger for participants with a higher IAF.

743 How can these findings be reconciled? First of all, this pattern suggests that  
744 different processing strategies were favored by different participants depending on their  
745 hearing and cognitive abilities. In this paradigm, this may be a result of a parallel  
746 parsing strategy (Fiebach, Vos, & Friederici, 2004; Frisch, Schlesewsky, Saddy, &  
747 Alpermann, 2002), i.e., simultaneous activation of multiple interpretations of the  
748 temporarily ambiguous sentence. It is possible that our better-hearing as well as our  
749 high-span participants simultaneously activated both the preferred and the dispreferred  
750 interpretation (see M. C. MacDonald, Just, & Carpenter, 1992). By contrast, the  
751 worse-hearing and the low-span participants only activated the preferred interpretation,  
752 thus resulting in higher processing effort, as reflected in a larger P600, when the  
753 ambiguity was resolved towards the dispreferred interpretation. Correspondingly, our  
754 higher-IAF participants exhibited a larger P600 at the later comparison point, thus  
755 indicating a higher likelihood of a successful reanalysis having taken place. We suggest  
756 that this pattern may reflect a dissociation between the effort required by the reanalysis  
757 and the likelihood of correctly computing the target interpretation. While reanalysis  
758 cost is dependent on cognitive resources and is therefore higher for individuals with



759 worse hearing and lower working memory capacity, the likelihood of reanalysis success  
760 depends on IAF. This intriguing result will be further explored in the Implications  
761 section below.

762 A resource-based view could explain why the results with hearing thresholds are  
763 very similar to the results with working memory span for the TVRR-TVDO  
764 comparison. Several studies have tested the "effortfulness hypothesis", which posits that  
765 successful perception in the face of degraded input (e.g. because of raised hearing  
766 thresholds) consumes resources which are then missing in downstream processing steps  
767 such as memory encoding (McCoy et al., 2005; Tun, Benichov, & Wingfield, 2010; Tun,  
768 McCoy, & Wingfield, 2009). This hypothesis could also explain our results for the  
769 TVRR-TVDO comparison. Possibly, participants with lower hearing thresholds deploy  
770 fewer resources in order to achieve successful perception of the sensory input, which  
771 would in turn allow them to allocate more resources to keeping both the preferred and  
772 the dispreferred interpretation in memory. Additionally, participants with a higher  
773 working memory capacity would have more resources available in general, and therefore,  
774 a higher recruitment of resources during perception would still allow participants with a  
775 larger resource pool to keep both interpretations of the RRC in memory.

#### 776 **Individual Differences in the Processing of Object Relative Clauses**

777 In the object relative clause / actor computation paradigm, we found that ORAI  
778 (object-relative, animate - inanimate) sentences were clearly rated as least acceptable.  
779 ORIA (object-relative inanimate - animate) and SRIA (subject-relative, inanimate -  
780 animate) sentences did not differ in their ratings, and SRAI (subject-relative, animate -  
781 inanimate) sentences were only slightly more acceptable than SRIA sentences. We  
782 expected this difference in acceptability ratings within the OR clauses due to animacy,  
783 with previous studies demonstrating that animacy is an important cue for OR clause  
784 processing (DeDe, 2015; Traxler et al., 2002; Weckerly & Kutas, 1999).

785 In the ERP analysis, we probed actor computation in the ORAI sentences compared  
786 to the ORIA sentences. Specifically, we compared ERPs in response to the subject of

787 the relative clause (fifth position). Based on previous research showing processing  
788 difficulties for inanimate object-relative clause subjects as compared to animate  
789 object-relative clause subjects (DeDe, 2015; Traxler et al., 2002; Weckerly & Kutas,  
790 1999), we expected an N400 for ORAI sentences in comparison with ORIA sentences.

791 Across the sample, there was no significant difference between the two conditions in  
792 the N400 time window. Again, this was not a hindrance for the VOI analyses, because  
793 the aim of the present study was to identify variables that would distinguish between  
794 these participants.

795 We again tested whether our VOI would predict the ERP difference between the  
796 conditions. However, although almost all models with the VOI provided a better fit to  
797 the data than models including only age, none exhibited a significant interaction with  
798 N400 amplitude. This was surprising, given the vast literature on ORC processing in  
799 older and hearing-impaired adults (e.g. DeCaro et al., 2016; Wingfield et al., 2006,  
800 2003). It is possible that the manipulation was simply not strong enough to reliably  
801 elicit an N400 in enough participants. In comparison to the RRC paradigm, where we  
802 analyzed responses to ungrammatical (IVWR) and dispreferred (TVRR) sentences, here  
803 in the ORC paradigm, the sentences were perfectly grammatical, albeit with a  
804 non-prototypical animacy configuration. Older adults as a group may, as a result of  
805 their experience, have had a high degree of exposure to inanimate agents and therefore  
806 would not necessarily rely on an internal model that favors animate agents.

807 In order to examine between-participant variability for this comparison more  
808 directly, we plotted the random slopes of condition per participant for N400 amplitude  
809 derived from the basic ORAI vs. ORIA model. Random slopes were indeed rather  
810 variable, and almost equally distributed to the right and to the left of the zero line (see  
811 Supplementary Figure S2, left panel).

812 As the study by Weckerly and Kutas (1999) only found the effect in question for  
813 good comprehenders, we conducted an additional analysis to ascertain whether N400  
814 amplitude in the most difficult ORAI condition would be related to acceptability ratings  
815 (see Supplementary Table S33 and Figure Supplementary Figure S3). Participants with

816 a larger (= more negative) N400 were less likely to give a low rating to the ORAI  
817 sentences than participants with a smaller N400. Assuming that good comprehenders  
818 would be more likely to give a good rating, this result suggests that N400 amplitude  
819 and comprehension are related in a similar way as in the Weckerly and Kutas (1999)  
820 study. Interestingly, this effect does not appear to be predicted by any of our VOI.

### 821 **VOI and Behaviour**

822 As a follow-up analysis, we analyzed whether the VOI that moderated ERPs would  
823 also moderate acceptability ratings. However, none of the VOI (PTA and RS for the  
824 TVRR-TVDO comparison and IAF for the IVWR-TVRR comparison) moderated  
825 acceptability rating differences. This is not entirely surprising given that  
826 neurophysiological data typically show more sensitivity to certain manipulations than  
827 behavioral data and are sometimes even used to test for differences in effort in the face  
828 of similar behavioral outcomes (see, for example, Bornkessel, McElree, Schlesewsky, &  
829 Friederici, 2004; Rolke, Heil, Streb, & Hennighausen, 2001).

### 830 **Mismatch Negativity (MMN)**

831 We included a MMN paradigm in the study in order to test whether the modulatory  
832 influence of hearing and cognitive abilities would also extend to pre-linguistic auditory  
833 ERP components. If this were the case, our VOI would arguably modulate central  
834 auditory processing in general, irrespective of the linguistic computations necessary for  
835 sentence comprehension. However, there was no correlation between MMN amplitude  
836 and any of our VOI. While we do not wish to take the absence of evidence for the  
837 evidence for absence, we nevertheless at least see a much stronger effect of the VOI on  
838 sentence processing than on central auditory processing in general.

### 839 **Implications**

840 Overall, we observed modulation of ERPs by hearing and cognitive abilities at two  
841 different stages of RRC processing.

842 The finding that sentence comprehension (and, thereby, also sentence processing) is  
843 predicted by hearing impairment is well established, especially in older adults  
844 (Wingfield et al., 2006). However, in these studies, participants are usually grouped  
845 depending on whether their sine wave perception exceeds a certain sound level threshold  
846 or not. Our findings on hearing thresholds could be considered surprising, because, if  
847 our sample had been clinically tested for their hearing ability, most, if not all of them,  
848 would likely have been classified as having normal hearing. Nevertheless, we found a  
849 significant relationship between hearing thresholds and ERP amplitudes in the RRC  
850 paradigm. A study by Ayasse et al. (2019) found that even in young adults who pass a  
851 screen for normal hearing, slightly elevated hearing thresholds detrimentally affected  
852 processing of difficult syntactic constructions. This suggests that it is important to  
853 consider hearing thresholds as continuous variables rather than considering people  
854 within certain threshold ranges as homogeneous groups.

855 We have explored these results in light of the "effortfulness hypothesis". The results  
856 can also be considered from the perspective of the predictive coding framework. This  
857 theory of brain function describes the brain as an empirical Bayesian device that  
858 continually aims to minimize prediction error, which is "the difference between the input  
859 observed and that predicted by the generative model" (Friston, 2005, p. 821). This  
860 principle is implemented at all levels of the cortical hierarchy. Prediction error results  
861 from a mismatch between the sensory input that propagates to higher cortical levels by  
862 means of feedforward connections and the prediction of the generative model of the  
863 environment that is projected to lower cortical levels by feedback connections (Friston,  
864 2005, 2010). Prediction error can also result in an update of the generative model,  
865 which serves the purpose of minimizing prediction error in the future when confronted  
866 with similar input. As Moran, Symmonds, Dolan, and Friston (2014) propose, aging can  
867 be viewed as reflecting "a progressive refinement and optimization of generative models"  
868 (Moran et al., 2014, p. 1). They note that the often observed attenuation of older  
869 adults' evoked responses compared to those of younger adults may be due to older  
870 adults' accumulation of sensory experience, resulting in less model updating.

871 Conceptually preceded by the similar account of *analysis by synthesis* (Bever &  
872 Poeppel, 2010; Halle & Stevens, 1962), the notion of such generative models is prolific  
873 in language comprehension research (e.g. Bornkessel-Schlesewsky & Schlewsky, 2019;  
874 Pickering & Garrod, 2007, 2013). Based on Moran et al. (2014), one would therefore  
875 expect older adults to have a higher tendency to refrain from updating their internal  
876 model after encountering an error in that model. This absence of model updating would  
877 result in a non-updated version of e.g. a garden-path sentence and could explain the  
878 difference between younger and older adults in adopting a "good-enough" interpretation  
879 of garden-path sentences (Christianson et al., 2006). However, as there is typically  
880 considerable inter-individual variability in older adults, also in language-related ERP  
881 research (Bornkessel-Schlesewsky et al., 2015; DeLong et al., 2012), it is useful to  
882 examine the individual differences that underlie this variability. In our study, IAF  
883 moderated the P600 amplitude difference between the ungrammatical IVWR and the  
884 reduced relative TVRR sentences. Although it is still unclear how exactly IAF is  
885 related to cognitive performance, an association between the two has been found  
886 repeatedly, and it has been suggested that IAF reflects cognitive performance at the  
887 level of general intelligence (Grandy, Werkle-Bergner, Chicherio, Lövdén, et al., 2013)  
888 rather than a specific cognitive ability per se. A similar account proposes that a high  
889 IAF reflects a trait or state that fosters optimal cognitive performance rather than  
890 optimal cognitive performance itself ("cognitive preparedness", Angelakis, Lubar,  
891 Stathopoulou, & Kounios, 2004). Evidence corroborating this hypothesis on the  
892 metabolic level showed that IAF is positively associated with regional cerebral blood  
893 flow (Jann, Koenig, Dierks, Boesch, & Federspiel, 2010), which facilitates rapid  
894 reorientation during cognitive tasks.

895 Returning to the results of our study, this notion of IAF as fostering mental  
896 flexibility and reorientation can also be applied to the reanalysis of sentences in which  
897 an ambiguity has been resolved towards a dispreferred interpretation. The larger P600  
898 in the IVWR-TVRR comparison for participants with higher IAFs would therefore  
899 reflect their stronger inclination towards reanalysis. To put it in predictive coding

900 terms: participants with a higher IAF were more inclined to update their internal  
901 model of the TVRR sentence, thus leading to a higher likelihood of the target reading  
902 being correctly computed.

903 In the ORC paradigm, we did not observe a modulation of ERP amplitude by  
904 hearing or cognitive ability. However, following the results of Weckerly and Kutas (1999)  
905 and assuming a relation between their comprehension scores and our acceptability  
906 scores, a larger N400 was related to a better acceptability rating of the ORAI sentences.  
907 Apparently, the N400 in this manipulation is more strongly related to the outcome of  
908 sentence processing than to any of our VOI. Considering two-component theories of  
909 intelligence that posit a "fluid" and a "crystallized" set of cognitive abilities (Cattell,  
910 1971; Horn, 1982; Hülür, Gasimova, Robitzsch, & Wilhelm, 2018), it is possible that the  
911 N400 would be better explained by a crystallized form of cognition like vocabulary size  
912 than by one of our cognitive VOI, all of which represent fluid cognitive measurements.

913 Future research should address whether the N400 amplitude in this comparison can  
914 be predicted with crystallized rather than fluid cognitive abilities. Also, it should try to  
915 discover how hearing thresholds and working memory relate to ORC processing at the  
916 neural level, thus linking back to previous behavioral studies (Amichetti et al., 2016;  
917 DeCaro et al., 2016; Wingfield et al., 2006, 2003).

918

## Conclusion

919 In the present study, we examined how hearing thresholds, working memory, IAF,  
920 and inhibition influence auditory sentence processing in healthy older adults. We found  
921 that hearing thresholds, working memory, and IAF modulated RRC processing at  
922 different time points. We did not observe a modulation of processing of ORCs differing  
923 in their animacy configuration, possibly due to the more subtle nature of the  
924 manipulation. In conclusion, there is no single hearing-related or cognitive variable that  
925 can be considered beneficial for auditory sentence comprehension in general, but it  
926 depends on the phenomenon in question.

927

## Acknowledgements

928 This work was supported by grants from the Swiss National Science Foundation  
929 (grant no. 172268 and 172268/2 to IK). During the work on her dissertation, IK was a  
930 pre-doctoral fellow of the International Max Planck Research School on the Life Course  
931 (LIFE). IBS acknowledges the support of an Australian Research Council Future  
932 Fellowship (FT160100437). The authors thank Madison Jade Richter for her extensive  
933 assistance in data acquisition and Maria Kliesch for German versions of the PsychoPy  
934 experiments.

935

References

- 936 Akaike, H. (1974, December). A new look at the statistical model identification. *IEEE*  
937 *Transactions on Automatic Control*, *19*(6), 716–723. doi:  
938 10.1109/TAC.1974.1100705
- 939 Alday, P. M. (2019, August). How much baseline correction do we need in ERP  
940 research? Extended GLM model can replace baseline correction while lifting its  
941 limits. *Psychophysiology*. doi: 10.1111/psyp.13451
- 942 Alday, P. M., Schlesewsky, M., & Bornkessel-Schlesewsky, I. (2017, November).  
943 Electrophysiology Reveals the Neural Dynamics of Naturalistic Auditory Language  
944 Processing: Event-Related Potentials Reflect Continuous Model Updates. *eneuro*,  
945 *4*(6), ENEURO.0311–16.2017. doi: 10.1523/ENEURO.0311-16.2017
- 946 Amichetti, N. M., White, A. G., & Wingfield, A. (2016, May). Multiple Solutions to  
947 the Same Problem: Utilization of Plausibility and Syntax in Sentence  
948 Comprehension by Older Adults with Impaired Hearing. *Frontiers in Psychology*,  
949 *7*. doi: 10.3389/fpsyg.2016.00789
- 950 Angelakis, E., Lubar, J. F., & Stathopoulou, S. (2004, November).  
951 Electroencephalographic peak alpha frequency correlates of cognitive traits.  
952 *Neuroscience Letters*, *371*(1), 60–63. doi: 10.1016/j.neulet.2004.08.041
- 953 Angelakis, E., Lubar, J. F., Stathopoulou, S., & Kounios, J. (2004, April). Peak alpha  
954 frequency: an electroencephalographic measure of cognitive preparedness. *Clinical*  
955 *Neurophysiology*, *115*(4), 887–897. doi: 10.1016/j.clinph.2003.11.034
- 956 Arlinger, S., Lunner, T., Lyxell, B., & Kathleen Pichora-Fuller, M. K. (2009, October).  
957 The emergence of Cognitive Hearing Science. *Scandinavian Journal of Psychology*,  
958 *50*(5), 371–384. doi: 10.1111/j.1467-9450.2009.00753.x
- 959 Ayasse, N. D., Penn, L. R., & Wingfield, A. (2019, June). Variations Within Normal  
960 Hearing Acuity and Speech Comprehension: An Exploratory Study. *American*  
961 *Journal of Audiology*, *28*(2), 369–375. doi: 10.1044/2019\_AJA-18-0173
- 962 Bates, D., Mächler, M., Bolker, B., & Walker, S. (2015). Fitting Linear Mixed-Effects  
963 Models Using lme4. *Journal of Statistical Software*, *67*(1). doi:



964 10.18637/jss.v067.i01

965 Bever, T. G. (1970). The cognitive basis for linguistic structures. In J. R. Hayes (Ed.),  
966 *Cognition and the development of language* (pp. 279–362). New York: Wiley.

967 Bever, T. G., & Poeppel, D. (2010). Analysis by Synthesis: A (Re-)Emerging Program  
968 of Research for Language and Vision. *Biolinguistics*, 4(2-3), 174–200.

969 Bisgaard, N., & Ruf, S. (2017, October). Findings From EuroTrak Surveys From 2009  
970 to 2015: Hearing Loss Prevalence, Hearing Aid Adoption, and Benefits of Hearing  
971 Aid Use. *American Journal of Audiology*, 26(3S), 451–461. doi:  
972 10.1044/2017\\_AJA-16-0135

973 Boersma, P., & van Heuven, V. (2001). Speak and unSpeak with PRAAT. *Glott*  
974 *International*, 5(9/10), 341–345.

975 Bornkessel, I., Fiebach, C. J., & Friederici, A. D. (2004, September). On the cost of  
976 syntactic ambiguity in human language comprehension: an individual differences  
977 approach. *Cognitive Brain Research*, 21(1), 11–21. doi:  
978 10.1016/j.cogbrainres.2004.05.007

979 Bornkessel, I., McElree, B., Schlesewsky, M., & Friederici, A. D. (2004, November).  
980 Multi-dimensional contributions to garden path strength: Dissociating phrase  
981 structure from case marking. *Journal of Memory and Language*, 51(4), 495–522.  
982 doi: 10.1016/j.jml.2004.06.011

983 Bornkessel, I., & Schlesewsky, M. (2006). The extended argument dependency model:  
984 A neurocognitive approach to sentence comprehension across languages.  
985 *Psychological Review*, 113(4), 787–821. doi: 10.1037/0033-295X.113.4.787

986 Bornkessel-Schlesewsky, I., Philipp, M., Alday, P. M., Kretzschmar, F., Grewe, T.,  
987 Gumpert, M., ... Schlesewsky, M. (2015, November). Age-Related Changes in  
988 Predictive Capacity Versus Internal Model Adaptability: Electrophysiological  
989 Evidence that Individual Differences Outweigh Effects of Age. *Frontiers in Aging*  
990 *Neuroscience*, 7. doi: 10.3389/fnagi.2015.00217

991 Bornkessel-Schlesewsky, I., & Schlesewsky, M. (2009, January). The Role of Prominence  
992 Information in the Real-Time Comprehension of Transitive Constructions: A

- 993 Cross-Linguistic Approach. *Language and Linguistics Compass*, 3(1), 19–58. doi:  
994 10.1111/j.1749-818X.2008.00099.x
- 995 Bornkessel-Schlesewsky, I., & Schlewsky, M. (2019, February). Toward a  
996 Neurobiologically Plausible Model of Language-Related, Negative Event-Related  
997 Potentials. *Frontiers in Psychology*, 10, 298. doi: 10.3389/fpsyg.2019.00298
- 998 Cattell, R. B. (1971). *Abilities: their structure, growth, and action*. Oxford, England:  
999 Houghton Mifflin. (Pages: xxii, 583)
- 1000 Christensen, R. H. B. (2019). A Tutorial on fitting Cumulative Link Mixed Models  
1001 with clmm2 from the ordinal Package. , 10.
- 1002 Christianson, K., Williams, C. C., Zacks, R. T., & Ferreira, F. (2006, September).  
1003 Younger and Older Adults' "Good-Enough" Interpretations of Garden-Path  
1004 Sentences. *Discourse Processes*, 42(2), 205–238. doi:  
1005 10.1207/s15326950dp4202\_6
- 1006 Corcoran, A. W., Alday, P. M., Schlewsky, M., & Bornkessel-Schlesewsky, I. (2018,  
1007 July). Toward a reliable, automated method of individual alpha frequency (IAF)  
1008 quantification. *Psychophysiology*, 55(7), e13064. doi: 10.1111/psyp.13064
- 1009 DeCaro, R., Peelle, J. E., Grossman, M., & Wingfield, A. (2016, February). The Two  
1010 Sides of Sensory–Cognitive Interactions: Effects of Age, Hearing Acuity, and  
1011 Working Memory Span on Sentence Comprehension. *Frontiers in Psychology*, 7.  
1012 doi: 10.3389/fpsyg.2016.00236
- 1013 DeDe, G. (2015, March). Effects of animacy on processing relative clauses in older and  
1014 younger adults. *Quarterly Journal of Experimental Psychology*, 68(3), 487–498.  
1015 doi: 10.1080/17470218.2014.956766
- 1016 DeDe, G., & Flax, J. K. (2016). Language comprehension in aging. In H. H. Wright  
1017 (Ed.), *Cognition, Language and Aging* (pp. 107–133). Amsterdam ; Philadelphia:  
1018 John Benjamins Publishing Company.
- 1019 DeLong, K. A., Groppe, D. M., Urbach, T. P., & Kutas, M. (2012, June). Thinking  
1020 ahead or not? Natural aging and anticipation during reading. *Brain and*  
1021 *Language*, 121(3), 226–239. doi: 10.1016/j.bandl.2012.02.006

- 1022 Duncan, C. C., Barry, R. J., Connolly, J. F., Fischer, C., Michie, P. T., Näätänen, R.,  
1023 . . . Van Petten, C. (2009, November). Event-related potentials in clinical  
1024 research: Guidelines for eliciting, recording, and quantifying mismatch negativity,  
1025 P300, and N400. *Clinical Neurophysiology*, *120*(11), 1883–1908. doi:  
1026 10.1016/j.clinph.2009.07.045
- 1027 Engelhardt, P. E., Nigg, J. T., & Ferreira, F. (2017, July). Executive Function and  
1028 Intelligence in the Resolution of Temporary Syntactic Ambiguity: An Individual  
1029 Differences Investigation. *Quarterly Journal of Experimental Psychology*, *70*(7),  
1030 1263–1281. doi: 10.1080/17470218.2016.1178785
- 1031 Eriksen, B. A., & Eriksen, C. W. (1974, January). Effects of noise letters upon the  
1032 identification of a target letter in a nonsearch task. *Perception & Psychophysics*,  
1033 *16*(1), 143–149. doi: 10.3758/BF03203267
- 1034 Federmeier, K. D., McLennan, D. B., Ochoa, E. D., & Kutas, M. (2002). The impact of  
1035 semantic memory organization and sentence context information on spoken  
1036 language processing by younger and older adults: An ERP study.  
1037 *Psychophysiology*, *39*, 14.
- 1038 Fiebach, C. J., Vos, S. H., & Friederici, A. D. (2004, November). Neural Correlates of  
1039 Syntactic Ambiguity in Sentence Comprehension for Low and High Span Readers.  
1040 *Journal of Cognitive Neuroscience*, *16*(9), 1562–1575. doi:  
1041 10.1162/0898929042568479
- 1042 Friederici, A. D., Steinhauer, K., Mecklinger, A., & Meyer, M. (1998, March). Working  
1043 memory constraints on syntactic ambiguity resolution as revealed by electrical  
1044 brain responses. *Biological Psychology*, *47*(3), 193–221. doi:  
1045 10.1016/S0301-0511(97)00033-1
- 1046 Frisch, S., & Schlesewsky, M. (2001, October). The N400 reflects problems of thematic  
1047 hierarchizing. *Neuroreport*, *12*(15), 3391–3394. doi:  
1048 10.1097/00001756-200110290-00048
- 1049 Frisch, S., Schlesewsky, M., Saddy, D., & Alpermann, A. (2002, October). The P600 as  
1050 an indicator of syntactic ambiguity. *Cognition*, *85*(3), B83–B92. doi:

- 1051 10.1016/S0010-0277(02)00126-9
- 1052 Friston, K. (2005, April). A theory of cortical responses. *Philosophical Transactions of*  
1053 *the Royal Society B: Biological Sciences*, 360(1456), 815–836. doi:  
1054 10.1098/rstb.2005.1622
- 1055 Friston, K. (2010, February). The free-energy principle: a unified brain theory? *Nature*  
1056 *Reviews Neuroscience*, 11(2), 127–138. doi: 10.1038/nrn2787
- 1057 Giroud, N., Hirsiger, S., Muri, R., Kegel, A., Dillier, N., & Meyer, M. (2018, January).  
1058 Neuroanatomical and resting state EEG power correlates of central hearing loss in  
1059 older adults. *Brain Structure and Function*, 223(1), 145–163. doi:  
1060 10.1007/s00429-017-1477-0
- 1061 Golden, C. J. (1976, July). Identification of brain disorders by the stroop color and  
1062 word test. *Journal of Clinical Psychology*, 32(3), 654–658. doi:  
1063 10.1002/1097-4679(197607)32:3<654::AID-JCLP2270320336>3.0.CO;2-Z
- 1064 Golden, C. J., & Freshwater, S. (1978). *Stroop color and word test*.
- 1065 Goman, A. M., & Lin, F. R. (2016, October). Prevalence of Hearing Loss by Severity in  
1066 the United States. *American Journal of Public Health*, 106(10), 1820–1822. doi:  
1067 10.2105/AJPH.2016.303299
- 1068 Grandy, T. H., Werkle-Bergner, M., Chicherio, C., Lövdén, M., Schmiedek, F., &  
1069 Lindenberger, U. (2013, October). Individual alpha peak frequency is related to  
1070 latent factors of general cognitive abilities. *NeuroImage*, 79, 10–18. doi:  
1071 10.1016/j.neuroimage.2013.04.059
- 1072 Grandy, T. H., Werkle-Bergner, M., Chicherio, C., Schmiedek, F., Lövdén, M., &  
1073 Lindenberger, U. (2013, June). Peak individual alpha frequency qualifies as a  
1074 stable neurophysiological trait marker in healthy younger and older adults: Alpha  
1075 stability. *Psychophysiology*, 50(6), 570–582. doi: 10.1111/psyp.12043
- 1076 Halle, M., & Stevens, K. (1962, February). Speech recognition: A model and a program  
1077 for research. *IEEE Transactions on Information Theory*, 8(2), 155–159. doi:  
1078 10.1109/TIT.1962.1057686
- 1079 Hasher, L., & Zacks, R. T. (1988). Working Memory, Comprehension, and Aging: A

- 1080 Review and a New View. In *Psychology of Learning and Motivation* (Vol. 22, pp.  
1081 193–225). Elsevier. doi: 10.1016/S0079-7421(08)60041-9
- 1082 Horn, J. L. (1982). The Theory of Fluid and Crystallized Intelligence in Relation to  
1083 Concepts of Cognitive Psychology and Aging in Adulthood. In F. I. M. Craik &  
1084 S. Trehub (Eds.), *Aging and Cognitive Processes* (pp. 237–278). Boston, MA:  
1085 Springer US. doi: 10.1007/978-1-4684-4178-9\_14
- 1086 Hülür, G., Gasimova, F., Robitzsch, A., & Wilhelm, O. (2018, July). Change in Fluid  
1087 and Crystallized Intelligence and Student Achievement: The Role of Intellectual  
1088 Engagement. *Child Development*, 89(4), 1074–1087. doi: 10.1111/cdev.12791
- 1089 Jann, K., Koenig, T., Dierks, T., Boesch, C., & Federspiel, A. (2010, May). Association  
1090 of individual resting state EEG alpha frequency and cerebral blood flow.  
1091 *NeuroImage*, 51(1), 365–372. doi: 10.1016/j.neuroimage.2010.02.024
- 1092 Jung, T.-P., Makeig, S., Humphries, C., Lee, T.-W., McKeown, M. J., Iragui, V., &  
1093 Sejnowski, T. J. (2000, March). Removing electroencephalographic artifacts by  
1094 blind source separation. *Psychophysiology*, 37(2), 163–178. doi:  
1095 10.1111/1469-8986.3720163
- 1096 Kemper, S., Crow, A., & Kemtes, K. (2004). Eye-Fixation Patterns of High- and  
1097 Low-Span Young and Older Adults: Down the Garden Path and Back Again.  
1098 *Psychology and Aging*, 19(1), 157–170. doi: 10.1037/0882-7974.19.1.157
- 1099 Kim, A. E., Oines, L., & Miyake, A. (2018, March). Individual differences in verbal  
1100 working memory underlie a tradeoff between semantic and structural processing  
1101 difficulty during language comprehension: An ERP investigation. *Journal of*  
1102 *Experimental Psychology: Learning, Memory, and Cognition*, 44(3), 406–420.  
1103 doi: 10.1037/xlm0000457
- 1104 Klimesch, W. (1999, April). EEG alpha and theta oscillations reflect cognitive and  
1105 memory performance: a review and analysis. *Brain Research Reviews*, 29(2-3),  
1106 169–195. doi: 10.1016/S0165-0173(98)00056-3
- 1107 Klimesch, W., Schimke, H., & Pfurtscheller, G. (1993, March). Alpha frequency,  
1108 cognitive load and memory performance. *Brain Topography*, 5(3), 241–251. doi:

1109 10.1007/BF01128991

1110 Kriegeskorte, N., Simmons, W. K., Bellgowan, P. S. F., & Baker, C. I. (2009, May).

1111 Circular analysis in systems neuroscience: the dangers of double dipping. *Nature*  
1112 *Neuroscience*, *12*(5), 535–540. doi: 10.1038/nn.2303

1113 Lecluyse, W., & Meddis, R. (2009, November). A simple single-interval adaptive  
1114 procedure for estimating thresholds in normal and impaired listeners. *The Journal*  
1115 *of the Acoustical Society of America*, *126*(5), 2570–2579. doi: 10.1121/1.3238248

1116 Lecluyse, W., Tan, C. M., McFerran, D., & Meddis, R. (2013, September). Acquisition  
1117 of auditory profiles for good and impaired hearing. *International Journal of*  
1118 *Audiology*, *52*(9), 596–605. doi: 10.3109/14992027.2013.796530

1119 Lewandowsky, S., Oberauer, K., Yang, L.-X., & Ecker, U. K. H. (2010, May). A  
1120 working memory test battery for MATLAB. *Behavior Research Methods*, *42*(2),  
1121 571–585. doi: 10.3758/BRM.42.2.571

1122 Lowsky, D. J., Olshansky, S. J., Bhattacharya, J., & Goldman, D. P. (2014, June).  
1123 Heterogeneity in Healthy Aging. *The Journals of Gerontology Series A: Biological*  
1124 *Sciences and Medical Sciences*, *69*(6), 640–649. doi: 10.1093/gerona/glt162

1125 MacDonald, M. C., Just, M. A., & Carpenter, P. A. (1992, January). Working memory  
1126 constraints on the processing of syntactic ambiguity. *Cognitive Psychology*, *24*(1),  
1127 56–98. doi: 10.1016/0010-0285(92)90003-K

1128 MacDonald, S. W. S., DeCarlo, C. A., & Dixon, R. A. (2011, July). Linking Biological  
1129 and Cognitive Aging: Toward Improving Characterizations of Developmental  
1130 Time. *The Journals of Gerontology Series B: Psychological Sciences and Social*  
1131 *Sciences*, *66B*(Supplement 1), i59–i70. doi: 10.1093/geronb/gbr039

1132 McCoy, S. L., Tun, P. A., Cox, L. C., Colangelo, M., Stewart, R. A., & Wingfield, A.  
1133 (2005, January). Hearing Loss and Perceptual Effort: Downstream Effects on  
1134 Older Adults' Memory for Speech. *The Quarterly Journal of Experimental*  
1135 *Psychology Section A*, *58*(1), 22–33. doi: 10.1080/02724980443000151

1136 Meddis, R., Lecluyse, W., Clark, N. R., Jürgens, T., Tan, C. M., Panda, M. R., &  
1137 Brown, G. J. (2013). A Computer Model of the Auditory Periphery and Its



- 1138 Application to the Study of Hearing. In B. C. J. Moore, R. D. Patterson,  
1139 I. M. Winter, R. P. Carlyon, & H. E. Gockel (Eds.), *Basic Aspects of Hearing* (pp.  
1140 11–20). Springer New York.
- 1141 Mick, P., Hämäläinen, A., Kolisang, L., Pichora-Fuller, M. K., Phillips, N., Guthrie, D.,  
1142 & Wittich, W. (2019, September). *The prevalence of hearing and vision loss in*  
1143 *older Canadians: An analysis of Data from the Canadian Longitudinal Study on*  
1144 *Aging* (preprint). PsyArXiv. doi: 10.31234/osf.io/v7kr5
- 1145 Moran, R. J., Symmonds, M., Dolan, R. J., & Friston, K. J. (2014, January). The  
1146 Brain Ages Optimally to Model Its Environment: Evidence from Sensory  
1147 Learning over the Adult Lifespan. *PLoS Computational Biology*, *10*(1), e1003422.  
1148 doi: 10.1371/journal.pcbi.1003422
- 1149 Mundy-Castle, A. C. (1958, June). Electrophysiological correlates of intelligence1.  
1150 *Journal of Personality*, *26*(2), 184–199. doi: 10.1111/j.1467-6494.1958.tb01579.x
- 1151 Nakano, H., Saron, C., & Swaab, T. Y. (2010, December). Speech and Span: Working  
1152 Memory Capacity Impacts the Use of Animacy but Not of World Knowledge  
1153 during Spoken Sentence Comprehension. *Journal of Cognitive Neuroscience*,  
1154 *22*(12), 2886–2898. doi: 10.1162/jocn.2009.21400
- 1155 Nasreddine, Z. S., Phillips, N. A., Bédirian, V., Charbonneau, S., Whitehead, V., Collin,  
1156 I., . . . Chertkow, H. (2005, April). The Montreal Cognitive Assessment, MoCA: A  
1157 Brief Screening Tool For Mild Cognitive Impairment. *Journal of the American*  
1158 *Geriatrics Society*, *53*(4), 695–699. doi: 10.1111/j.1532-5415.2005.53221.x
- 1159 Novick, J. M., Trueswell, J. C., & Thompson-Schill, S. L. (2010, October). Broca’s  
1160 Area and Language Processing: Evidence for the Cognitive Control Connection:  
1161 Broca’s Area and Language Processing. *Language and Linguistics Compass*,  
1162 *4*(10), 906–924. doi: 10.1111/j.1749-818X.2010.00244.x
- 1163 Näätänen, R., Pakarinen, S., Rinne, T., & Takegata, R. (2004, January). The mismatch  
1164 negativity (MMN): towards the optimal paradigm. *Clinical Neurophysiology*,  
1165 *115*(1), 140–144. doi: 10.1016/j.clinph.2003.04.001
- 1166 Obler, L. K., Fein, D., Nicholas, M., & Albert, M. L. (1991, December). Auditory

- 1167 comprehension and aging: Decline in syntactic processing. *Applied*  
1168 *Psycholinguistics*, 12(4), 433–452. doi: 10.1017/S0142716400005865
- 1169 Oostenveld, R., Fries, P., Maris, E., & Schoffelen, J.-M. (2011). FieldTrip: Open Source  
1170 Software for Advanced Analysis of MEG, EEG, and Invasive Electrophysiological  
1171 Data. *Computational Intelligence and Neuroscience*, 2011, 1–9. doi:  
1172 10.1155/2011/156869
- 1173 Osterhout, L., & Holcomb, P. J. (1992, December). Event-related brain potentials  
1174 elicited by syntactic anomaly. *Journal of Memory and Language*, 31(6), 785–806.  
1175 doi: 10.1016/0749-596X(92)90039-Z
- 1176 Osterhout, L., & Holcomb, P. J. (1993, November). Event-related potentials and  
1177 syntactic anomaly: Evidence of anomaly detection during the perception of  
1178 continuous speech. *Language and Cognitive Processes*, 8(4), 413–437. doi:  
1179 10.1080/01690969308407584
- 1180 Payne, B. R., Grison, S., Gao, X., Christianson, K., Morrow, D. G., & Stine-Morrow,  
1181 E. A. (2014, February). Aging and individual differences in binding during  
1182 sentence understanding: Evidence from temporary and global syntactic  
1183 attachment ambiguities. *Cognition*, 130(2), 157–173. doi:  
1184 10.1016/j.cognition.2013.10.005
- 1185 Perrin, F., Pernier, J., Bertnard, O., Giard, M., & Echallier, J. (1987, January).  
1186 Mapping of scalp potentials by surface spline interpolation. *Electroencephalography*  
1187 *and Clinical Neurophysiology*, 66(1), 75–81. doi: 10.1016/0013-4694(87)90141-6
- 1188 Pichora-Fuller, M. K. (2003, January). Processing speed and timing in aging adults:  
1189 psychoacoustics, speech perception, and comprehension. *International Journal of*  
1190 *Audiology*, 42(sup1), 59–67. doi: 10.3109/14992020309074625
- 1191 Pickering, M. J., & Garrod, S. (2007, March). Do people use language production to  
1192 make predictions during comprehension? *Trends in Cognitive Sciences*, 11(3),  
1193 105–110. doi: 10.1016/j.tics.2006.12.002
- 1194 Pickering, M. J., & Garrod, S. (2013, August). An integrated theory of language  
1195 production and comprehension. *Behavioral and Brain Sciences*, 36(4), 329–347.



- 1196 doi: 10.1017/S0140525X12001495
- 1197 R Core Team. (2018). *R: A Language and Environment for Statistical Computing*.  
1198 Vienna, Austria: R Foundation for Statistical Computing.
- 1199 Rolke, B., Heil, M., Streb, J., & Hennighausen, E. (2001, March). Missed prime words  
1200 within the attentional blink evoke an N400 semantic priming effect.  
1201 *Psychophysiology*, 38(2), 165–174. doi: 10.1111/1469-8986.3820165
- 1202 Salthouse, T. A. (1996). The Processing-Speed Theory of Adult Age Differences in  
1203 Cognition. *Psychological Review*, 103(3), 26.
- 1204 Savitzky, A., & Golay, M. J. E. (1964, July). Smoothing and Differentiation of Data by  
1205 Simplified Least Squares Procedures. *Analytical Chemistry*, 36(8), 1627–1639.  
1206 doi: 10.1021/ac60214a047
- 1207 Scarpina, F., & Tagini, S. (2017, April). The Stroop Color and Word Test. *Frontiers in*  
1208 *Psychology*, 8. doi: 10.3389/fpsyg.2017.00557
- 1209 Schad, D. J., Vasishth, S., Hohenstein, S., & Kliegl, R. (2020, February). How to  
1210 capitalize on a priori contrasts in linear (mixed) models: A tutorial. *Journal of*  
1211 *Memory and Language*, 110, 104038. doi: 10.1016/j.jml.2019.104038
- 1212 Traxler, M. J., Morris, R. K., & Seely, R. E. (2002, July). Processing Subject and  
1213 Object Relative Clauses: Evidence from Eye Movements. *Journal of Memory and*  
1214 *Language*, 47(1), 69–90. doi: 10.1006/jmla.2001.2836
- 1215 Traxler, M. J., Williams, R. S., Blozis, S. A., & Morris, R. K. (2005, August). Working  
1216 memory, animacy, and verb class in the processing of relative clauses. *Journal of*  
1217 *Memory and Language*, 53(2), 204–224. doi: 10.1016/j.jml.2005.02.010
- 1218 Tun, P. A., Benichov, J., & Wingfield, A. (2010). Response latencies in auditory  
1219 sentence comprehension: Effects of linguistic versus perceptual challenge.  
1220 *Psychology and Aging*, 25(3), 730–735. doi: 10.1037/a0019300
- 1221 Tun, P. A., McCoy, S., & Wingfield, A. (2009). Aging, hearing acuity, and the  
1222 attentional costs of effortful listening. *Psychology and Aging*, 24(3), 761–766. doi:  
1223 10.1037/a0014802
- 1224 van Casteren, M., & Davis, M. H. (2006, November). Mix, a program for

- 1225 pseudorandomization. *Behavior Research Methods*, *38*(4), 584–589. doi:  
1226 10.3758/BF03193889
- 1227 Vuong, L. C., & Martin, R. C. (2014, March). Domain-specific executive control and  
1228 the revision of misinterpretations in sentence comprehension. *Language, Cognition  
1229 and Neuroscience*, *29*(3), 312–325. doi: 10.1080/01690965.2013.836231
- 1230 Wagenmakers, E.-J., & Farrell, S. (2004, February). AIC model selection using Akaike  
1231 weights. *Psychonomic Bulletin & Review*, *11*(1), 192–196. doi:  
1232 10.3758/BF03206482
- 1233 Weckerly, J., & Kutas, M. (1999, September). An electrophysiological analysis of  
1234 animacy effects in the processing of object relative sentences. *Psychophysiology*,  
1235 *36*(5), 559–570. doi: 10.1111/1469-8986.3650559
- 1236 Wingfield, A., McCoy, S. L., Peelle, J. E., Tun, P. A., & Cox, C. L. (2006, July).  
1237 Effects of Adult Aging and Hearing Loss on Comprehension of Rapid Speech  
1238 Varying in Syntactic Complexity. *Journal of the American Academy of Audiology*,  
1239 *17*(7), 487–497. doi: 10.3766/jaaa.17.7.4
- 1240 Wingfield, A., Peelle, J. E., & Grossman, M. (2003, December). Speech Rate and  
1241 Syntactic Complexity as Multiplicative Factors in Speech Comprehension by  
1242 Young and Older Adults. *Aging, Neuropsychology, and Cognition  
1243 (Neuropsychology, Development and Cognition: Section B)*, *10*(4), 310–322. doi:  
1244 10.1076/anec.10.4.310.28974
- 1245 Yoo, H., & Dickey, M. W. (2017, August). Aging Effects and Working Memory in  
1246 Garden-Path Recovery. *Clinical Archives of Communication Disorders*, *2*(2),  
1247 91–102. doi: 10.21849/cacd.2017.00122
